# Supplementary material for: Metabolomic Profiles of Dinophysis acuminata and Dinophysis acuta Using Non-Targeted High-Resolution Mass Spectrometry: Effect of Nutritional Status and Prey
Source: Mar Drugs. 2018 Apr 26;16(5):143. doi: 10.3390/md16050143 (PMC5982093; doi:10.3390/md16050143)
Supplement: Supplementary file 1 [file marinedrugs-16-00143-s001.xlsx]

## Sheet: S1a
Table S1A: Compounds common to all species in Experiment 1
Compound			RT	Mass	Score	ESI	Abundance		Species
Mar Nat Prod	ID	Metlin					AV	SD
	S1A-1	C46 H75 O10 P	5.63617	836.475	59.53	-	15.8601	0.0263	T. amphioxeia
				836.475			12.7866	0.01258	M. rubrum
		PG(18:3(9Z,12Z,15Z)/22:5(7Z,10Z,13Z,16Z,19Z))		836.475			12.0414	0.663	D. acuta
				836.475			16.4892	0.0524	D. acuminata
	S1A-2	C45 H68 O10	6.34292	814.49	89.79	-	16.2283	0.0225	T. amphioxeia
			6.34292	814.49			13.0317	0.369	M. rubrum
		MGDG(18:5(3Z,6Z,9Z,12Z,15Z)/18:4(6Z,9Z,12Z,15Z))	6.34292	814.49			12.5053	0.02145	D. acuta
			6.34292	814.49			14.0543	0.08	D. acuminata
C25 H50 N5 Na O	S1A-3	C25 H50 N5 Na O (exception p<0.05)	4.3992	459.391	97.69	+	23.3362	0.056	T. amphioxeia
							16.7562	0.357	M. rubrum
							0.885943	1.25	D. acuta
							12.3679	0.0834	D. acuminata

## Sheet: S1b
Table S1B: Compounds common to all species in Experiment 2
Compound		ID	RT	Mass	Score	ESI	Abundance		Species	Origin	Feeding
Mar Nat Prod	Metlin						AV	SD
C30 H49 N O6	C30 H49 N O6	S1B-1	3.582	519.356	99.01	+	16.7376	0.118109	T. amphioxeia	Spain	well-fed
							16.4986	0.305548	M. rubrum	Spain	well-fed
							15.6197	0.413129	M. rubrum	Denmark	well-fed
							14.5774	0.210071	D. acuta	Spain	well-fed
							15.5458	0.34267	D. acuta	Denmark	well-fed
							13.7211	0.22578	D. acuta	Spain	Prey-limited
							18.1438	0.150216	D. acuta	Denmark	Prey-limited
							14.6616	0.703518	D. acuminata	Spain	well-fed
							12.0148	0.334295	D. acuminata	Denmark	well-fed
							15.8025	0.302118	D. acuminata	Spain	Prey-limited
							12.7708	0.513931	D. acuminata	Denmark	Prey-limited
C31 H57 N O6	C31 H57 N O6	S1B-2	4.718	539.418	98.69	+	16.9704	0.165976	T. amphioxeia	Spain	well-fed
							13.4365	0.0604967	M. rubrum	Spain	well-fed
							13.8803	0.228858	M. rubrum	Denmark	well-fed
							11.4695	0.229714	D. acuta	Spain	well-fed
							10.9854	0.308454	D. acuta	Denmark	well-fed
							11.3701	0.0630225	D. acuta	Spain	Prey-limited
							11.2057	0.46831	D. acuta	Denmark	Prey-limited
							11.7877	0.630619	D. acuminata	Spain	well-fed
							11.207	0.426396	D. acuminata	Denmark	well-fed
							11.6297	0.418497	D. acuminata	Spain	Prey-limited
							9.85373	0.265159	D. acuminata	Denmark	Prey-limited
C28 H47 N O6	C28 H47 N O6	S1B-3	3.339	493.34	98.11	+	17.0068	0.0817571	T. amphioxeia	Spain	well-fed
							17.3012	0.227773	M. rubrum	Spain	well-fed
							15.7197	0.511598	M. rubrum	Denmark	well-fed
							15.7487	0.444666	D. acuta	Spain	well-fed
							16.6084	0.224193	D. acuta	Denmark	well-fed
							14.942	0.119996	D. acuta	Spain	Prey-limited
							18.2374	0.153458	D. acuta	Denmark	Prey-limited
							14.7591	1.14201	D. acuminata	Spain	well-fed
							10.9743	0.243584	D. acuminata	Denmark	well-fed
							17.0675	0.295999	D. acuminata	Spain	Prey-limited
							14.5976	0.29283	D. acuminata	Denmark	Prey-limited
Melanodocin; Me ester (Mass: 850,4539)	C46 H71 O10 P	S1B-4	5.3291	832.443	Metlin 53,04	-	17.2134	0.120458	T. amphioxeia	Spain	well-fed
							12.2194	0.202817	M. rubrum	Spain	well-fed
							14.0824	0.178966	M. rubrum	Denmark	well-fed
							11.5513	0.154663	D. acuta	Spain	well-fed
							11.6571	0.136371	D. acuta	Denmark	well-fed
	PG(22:6(4Z,7Z,10Z,13Z,16Z,19Z)/18:4(6Z,9Z,12Z,15Z))				Mar Nat Prod 99,3		10.4957	0.13656	D. acuta	Spain	Prey-limited		Melanodocin methyl ester (C45H70O13S): isolated from sponge Halichondria melanodocia, cytotoxic agent
							11.3709	0.115415	D. acuta	Denmark	Prey-limited		Melanodocin is an isomer of Acanthifolicin, which is an sulfide derviative of okadaic acid.
							12.5968	0.170017	D. acuminata	Spain	well-fed
							11.439	0.142229	D. acuminata	Denmark	well-fed
							12.1063	0.102225	D. acuminata	Spain	Prey-limited
							9.36974	0.784	D. acuminata	Denmark	Prey-limited
	C51 H78 O15	S1B-5	5.426	930.535	91.63	+	21.8068	0.0634304	T. amphioxeia	Spain	well-fed
							15.9456	0.16519	M. rubrum	Spain	well-fed
							15.2284	0.272583	M. rubrum	Denmark	well-fed
							15.0946	0.0621567	D. acuta	Spain	well-fed
							14.5759	0.137306	D. acuta	Denmark	well-fed
	DGDG(18:5(3Z,6Z,9Z,12Z,15Z)/18:4(6Z,9Z,12Z,15Z))						13.5502	0.149788	D. acuta	Spain	Prey-limited
							15.4251	0.154303	D. acuta	Denmark	Prey-limited
							15.9937	0.245754	D. acuminata	Spain	well-fed
							15.1796	0.0766073	D. acuminata	Denmark	well-fed
							15.1142	0.0653875	D. acuminata	Spain	Prey-limited
							13.2248	0.521514	D. acuminata	Denmark	Prey-limited
	C45 H70 O10	S1B-6	6.292	814.487	96.54	-	23.1873	0.0721051	T. amphioxeia	Spain	well-fed
							17.5517	0.0831607	M. rubrum	Spain	well-fed
							18.0274	0.159296	M. rubrum	Denmark	well-fed
							16.4174	0.0689318	D. acuta	Spain	well-fed
							15.8047	0.10841	D. acuta	Denmark	well-fed
	MGDG(20:5(5Z,8Z,11Z,14Z,17Z)/16:3(7Z,10Z,13Z))						14.9586	0.105376	D. acuta	Spain	Prey-limited
							16.2076	0.0974376	D. acuta	Denmark	Prey-limited
							17.2931	0.118828	D. acuminata	Spain	well-fed
							16.2351	0.0358962	D. acuminata	Denmark	well-fed
							15.8598	0.07232	D. acuminata	Spain	Prey-limited
							14.1253	1.09877	D. acuminata	Denmark	Prey-limited
	C45 H68 O10	S1B-7	6.29226	804.458	95.07	-	19.4903	0.0389998	T. amphioxeia	Spain	well-fed
							14.7237	0.0989887	M. rubrum	Spain	well-fed
							15.1146	0.245754	M. rubrum	Denmark	well-fed
							12.6876	0.0624828	D. acuta	Spain	well-fed
							12.2671	0.042692	D. acuta	Denmark	well-fed
	MGDG(18:5(3Z,6Z,9Z,12Z,15Z)/18:4(6Z,9Z,12Z,15Z))						11.5165	0.14904	D. acuta	Spain	Prey-limited
							12.5086	0.127415	D. acuta	Denmark	Prey-limited
							13.8754	0.0869333	D. acuminata	Spain	well-fed
							12.9891	0.0149829	D. acuminata	Denmark	well-fed
							12.6052	0.067428	D. acuminata	Spain	Prey-limited
							10.3957	0.950419	D. acuminata	Denmark	Prey-limited
	C45 H68 O10	S1B-8	6.294	768.482	95.38	+	22.8598	0.0595609	T. amphioxeia	Spain	well-fed
							16.3604	0.129926	M. rubrum	Spain	well-fed
							17.1698	0.407071	M. rubrum	Denmark	well-fed
							16.4343	0.109703	D. acuta	Spain	well-fed
							16.0628	0.140808	D. acuta	Denmark	well-fed
	MGDG(18:5(3Z,6Z,9Z,12Z,15Z)/18:4(6Z,9Z,12Z,15Z))						15.2195	0.115676	D. acuta	Spain	Prey-limited
							16.8711	0.0692433	D. acuta	Denmark	Prey-limited
							17.4506	0.151272	D. acuminata	Spain	well-fed
							16.3356	0.0396387	D. acuminata	Denmark	well-fed
							16.4109	0.169989	D. acuminata	Spain	Prey-limited
							15.0599	0.792276	D. acuminata	Denmark	Prey-limited
Malevamide A (Mass: 1000,5981)	C51 H84 O15	S1B-9	6.41158	982.587	Metlin 93,89	-	19.4083	0.0844889	T. amphioxeia	Spain	well-fed
							13.0963	0.196822	M. rubrum	Spain	well-fed
							14.0521	0.201354	M. rubrum	Denmark	well-fed
							12.5198	0.0925153	D. acuta	Spain	well-fed		Malevamide A (C54H80N8O10): octapeptide isolated from the cyanobacterium Symploca laete-viridis
							12.2549	0.117126	D. acuta	Denmark	well-fed
	1,2-Di-(9Z,12Z,15Z-octadecatrienoyl)-3-(Galactosyl-alpha-1-6-Galactosyl-beta-1)-glycerol				Mar Nat Prod 75,24		11.4887	0.150961	D. acuta	Spain	Prey-limited
							12.6273	0.080346	D. acuta	Denmark	Prey-limited
							14.4243	0.153897	D. acuminata	Spain	well-fed
							14.7043	0.0195753	D. acuminata	Denmark	well-fed
							14.6615	0.03419	D. acuminata	Spain	Prey-limited
							13.184	0.916241	D. acuminata	Denmark	Prey-limited
	C45 H70 O10	S1B-10	6.54342	816.503	97.25	-	21.0706	0.0813516	T. amphioxeia	Spain	well-fed
							13.29	0.184283	M. rubrum	Spain	well-fed
							15.8167	0.210298	M. rubrum	Denmark	well-fed
							15.8083	0.0654204	D. acuta	Spain	well-fed
							15.7809	0.166817	D. acuta	Denmark	well-fed
	MGDG(20:5(5Z,8Z,11Z,14Z,17Z)/16:3(7Z,10Z,13Z))						14.5275	0.273483	D. acuta	Spain	Prey-limited
							16.6922	0.0708347	D. acuta	Denmark	Prey-limited
							14.5237	0.0406816	D. acuminata	Spain	well-fed
							14.3028	0.022103	D. acuminata	Denmark	well-fed
							16.4003	0.177376	D. acuminata	Spain	Prey-limited
							15.1082	0.141696	D. acuminata	Denmark	Prey-limited
	C45 H70 O10	S1B-11	6.7291	816.504	93.7	-	20.2924	0.0792971	T. amphioxeia	Spain	well-fed
							15.6625	0.108045	M. rubrum	Spain	well-fed
							15.0073	0.429841	M. rubrum	Denmark	well-fed
							14.3193	0.0638807	D. acuta	Spain	well-fed
							13.3452	0.0792602	D. acuta	Denmark	well-fed
	MGDG(20:5(5Z,8Z,11Z,14Z,17Z)/16:3(7Z,10Z,13Z))						13.6849	0.0541525	D. acuta	Spain	Prey-limited
							13.8993	0.0347704	D. acuta	Denmark	Prey-limited
							14.9629	0.0346527	D. acuminata	Spain	well-fed
							14.486	0.0854869	D. acuminata	Denmark	well-fed
							14.6211	0.018632	D. acuminata	Spain	Prey-limited
							13.1433	0.946221	D. acuminata	Denmark	Prey-limited
Lydicamycin; 8-Deoxy, 14,15- didehydro (Mass: 836,5291)	C45 H74 O11	S1B-12	7.1	818.519	Metlin: 96,82	-	17.3574	3.35741	T. amphioxeia	Spain	well-fed
							14.1501	0.4215	M. rubrum	Spain	well-fed
							18.6723	2.54674	M. rubrum	Denmark	well-fed
							13.8211	0.465046	D. acuta	Spain	well-fed
							14.0721	0.268844	D. acuta	Denmark	well-fed		8-deoxy, 14,15-didehydro Lydicamycin: produced by the marine-derived Streptomyces platensis (active against gram-positive bacteria including MRSA)
	Oligomycin A				Mar Nat Prod: 91,64		15.3238	0.092301	D. acuta	Spain	Prey-limited
							13.4701	0.786693	D. acuta	Denmark	Prey-limited
							14.4236	0.895051	D. acuminata	Spain	well-fed
							15.6029	0.157568	D. acuminata	Denmark	well-fed
							14.7107	0.0566015	D. acuminata	Spain	Prey-limited
							15.2069	0.215698	D. acuminata	Denmark	Prey-limited

## Sheet: S2
Table S2: T. amphioxeia compounds from Experiment 2 (ESI-)
Mar Nat Prod	ID	RT	Mass	Score	ESI	Abundance		Species	Origin	Feeding
						AV	SD
Cephalostatin 3; 9'-Deoxy, 8'- hydroxy, 9',11'-didehydro, 14'α ,15'α-epoxide (= cephalostatin 15)	S2-1	7.37	1016.44	95.36	-	15.25	0.1	T. amphioxeia	Spain	well-fed		Constituent of hemichordate marine worm Cephalodiscus gilchristi, cell growth inhibitor and antitumor activity
Phosphatidylethanolamine; Glycerol 1,2-di-9Z ,12Z - octadecadienoate 3- phosphoethanolamine	S2-2	8.52	799.535	97.07	-	17.43	0.04	T. amphioxeia	Spain	well-fed

## Sheet: S3a
Table S3A: Compounds occurring in both species of Dinophysis but specific to "prey origin" (ESI+), fold-change > 2, p < 0.001
Compound	ID	p (Corr) (Prey-origin)
9-Hydroxy-3-methyl-2-decenoic acid; (2Z ,9R )-form, O - Tricosanoyl, 2-sulfoethyl ester	S3A-1	6.68e-19
C25 H54 N15 Na	S3A-2	1.03e-13
C27 H54 N5 Na O	S3A-3	8.24e-11
C33 H65 N O6 S	S3A-4	1.46e-10
C35 H65 N8 O S	S3A-5	1.04e-05
5,6-Dihydroxy-7,9,11,14- eicosatetraenoic acid; (5R ,6S ,7E ,9E ,11Z ,14Z )-form, Me ester	S3A-6	1.04e-05
11,14-Epoxy-7-hydroxy-4,8(17)- briaradien-18,7-olide; (4E ,7ctOH , 1113,1413)-form, Me ether	S3A-7	3.31e-05
Deacetyldihydrobotrydial; 15- Oxo, 10-Me ether	S3A-8	4.59e-05
2,6,10-Farnesatrien-1-oic acid; 6S,7S :10R ,11-Diepoxide, Me ester	S3A-9	6.88e-05
C29 H56 N5 Na O	S3A-10	7.8e-05
7,11-Dihydroxy-8-drimen-12,11- olide; (7a,11a)-form	S3A-11	0.00015
C32 H43 N4 Na	S3A-12	0.00015
C39 H76 O9	S3A-13	0.000193
Auripyrone A	S3A-14	0.000193		Auripyrone A (C33H50O7): Isolated from the sea hare Dolabella auricularia (cytotoxic)
6,13-Epoxy-4,7,8,12- eunicellanetetrol; (4f3,6a,7ct,8a, 1213,13ct)-form, 4,8-Di-Ac	S3A-15	0.000193
C39 H54 N5 Na O6	S3A-16	0.000193
6,13-Epoxy-4,7,8,12- eunicellanetetrol; (4f3,6a,7ct,8a, 1213,13ct)-form, 4,8-Di-Ac Esi+ 1.9648181	S3A-17	0.000193
> limit Esi+ 10.420134	S3A-18	0.000193
2,9:3,16-Diepoxy-7,11- dihydroxy-4-asbestinanone; (7 a,1113)-form, 11-Butanoyl	S3A-19	0.000211
C24 H44 N11 Na	S3A-20	0.000211
Muqubilin; (13R ,16S ,17R )- form	S3A-21	0.00035
> limit Esi+ 6.2342305	S3A-22	0.000383
> limit Esi+ 8.119182	S3A-23	0.000392
22,25-Epoxy-24-methylfurostane- 2,3,11,20-tetrol; (2ct,3ct,5ct,1113, 1613,20R ,22R ,24S )-form, 2-Ac	S3A-24	0.000479
Isochlorin e4	S3A-25	0.000479		Isochlorin e4 (C33H36N4O4): isolated from the red alga Dasya pedicellata, blue-green pigment
2,12-Epoxy-3,7-cembradiene-11, 15,16-triol; (1S ,2R ,3E ,7E ,11S , 12R ,15S)-form	S3A-26	0.000604
C35 H47 N8	S3A-27	0.00071
4,6-Diethyl-3,6-dihydro-6-(2- methylhexyl)-1,2-dioxin-3- acetic acid; (3S ,6R ,8S )-form	S3A-28	0.000771
2,3,14,20,22,25- Hexahydroxycholesta-4,7-dien-6- one; (213,313,14a,20R ,22R )-form	S3A-29	0.000771

## Sheet: S3b
Table S3B: Compounds differing between the two species of Dinophysis with fold-change > 2, p < 0.001 (ESI+)
Compound	ID	p (Corr) (Species)
4,6-Diethyl-3,6-dihydro-6-(2- methylhexyl)-1,2-dioxin-3- acetic acid; (3S ,6R ,8S )-form	S3B-1	1.28795e-25
> limit Esi+ 9.497456	S3B-2	1.6602e-25
7,11-Dihydroxy-8-drimen-12,11- olide; (7a,11a)-form	S3B-3	1.74495e-25
C39 H76 O9	S3B-4	1.74495e-25
Auripyrone A	S3B-5	1.74495e-25		Auripyrone A (C33H50O7): Isolated from the sea hare Dolabella auricularia (cytotoxic)
> limit Esi+ 8.119182	S3B-6	1.74495e-25
2,3,14,20,22,25- Hexahydroxycholesta-4,7-dien-6- one; (213,313,14a,20R ,22R )-form	S3B-7	1.74495e-25
Pectenotoxin 1; 43-Deoxy	S3B-8	1.74495e-25		43 deoxy-pectenotoxin 1 (=PTX2) (C47H70O14): from Dinophysis fortii, from D. acuta
2-(Aminomethyl)-2-propenoic acid; N -Hexadecanoyl, Me ester	S3B-9	1.74495e-25
2-(Aminomethyl)-2-propenoic acid; N -(2-Oxohexadecanoyl), Me ester	S3B-10	2.01631e-25
22,25-Epoxy-24-methylfurostane- 2,3,11,20-tetrol; (2ct,3ct,5ct,1113, 1613,20R ,22R ,24S )-form, 2-Ac	S3B-11	3.35322e-25
> limit Esi+ 6.8737273	S3B-12	3.35322e-25
Petrosolic acid Esi+ 3.6589997	S3B-13	3.35322e-25		Petrosolic acid (): polyacetylene isolated from the Red Sea sponge Petrosia sp.
Muqubilin; (13R ,16S ,17R )- form	S3B-14	3.82143e-25
> limit Esi+ 3.8143637	S3B-15	4.70308e-25
Petrosolic acid	S3B-16	4.74627e-25		Petrosolic acid (): polyacetylene isolated from the Red Sea sponge Petrosia sp.
> limit Esi+ 3.8074548	S3B-17	5.86516e-25
> limit Esi+ 3.4092727	S3B-18	5.86516e-25
Okadaic acid; 7-Hydroxy-2,4- dimethyl-2E ,4E -heptadienyl ester	S3B-19	7.9013e-25
C36 H47 N4 Na	S3B-20	7.9013e-25
> limit Esi+ 3.8174546	S3B-21	7.9013e-25
> limit Esi+ 3.4078178	S3B-22	7.9013e-25
2,12-Epoxy-3,7-cembradiene-11, 15,16-triol; (1S ,2R ,3E ,7E ,11S , 12R ,15S)-form	S3B-23	1.1515e-24
> limit Esi+ 3.5579093	S3B-24	1.1515e-24
17,20-Epoxy-23-methylergost-5- ene-3,22-diol; (313,1713,20R ,22?, 23?,24?)-form, Di-Ac	S3B-25	1.39912e-24
6,13-Epoxy-4,7,8,12- eunicellanetetrol; (4f3,6a,7ct,8a, 1213,13ct)-form, 4,8-Di-Ac	S3B-26	1.42708e-24
C39 H54 N5 Na O6	S3B-27	1.42708e-24
29-Methylstigmastane-3,5,6, 8,15,28,29-heptol	S3B-28	1.59594e-24
Deacetyldihydrobotrydial; 15- Oxo, 10-Me ether	S3B-29	2.02569e-24
6,13-Epoxy-4,7,8,12- eunicellanetetrol; (4f3,6a,7ct,8a, 1213,13ct)-form, 4,8-Di-Ac Esi+ 1.9648181	S3B-30	2.02569e-24
> limit Esi+ 3.194	S3B-31	2.15257e-24
Pectenotoxin 1; Dihydro (?) Esi+ 4.334636	S3B-32	2.16659e-24		dihydro-pectenotoxin 1 = PTX5 (C47H72O15): from Dinophysis fortii
Ergosta-4,22-diene-3,6,8,15,16, 26-hexol	S3B-33	2.22466e-24
C9 H2 Cl3 N5 Na O S5	S3B-34	2.22466e-24
Tyrosine; (S)-form, N -(12- Hydroxy-4,6R -dimethyl-2E ,4E - dodecadienoyl)	S3B-35	2.27236e-24
2,6,10-Farnesatrien-1-oic acid; 6S,7S :10R ,11-Diepoxide, Me ester	S3B-36	2.31356e-24
> limit Esi+ 3.0530908	S3B-37	2.73524e-24
Stigmast-5-en-3-ol; (313,24R )- form, O -[3-D-Glucopyranosyl-(1 ?*4)-ct-L-arabinopyranoside]	S3B-38	2.9388e-24
> limit Esi+ 2.9722726	S3B-39	3.40283e-24
C16 H38 N9 O8	S3B-40	3.53724e-24
Patellin 1	S3B-41	3.65083e-24		Patellin 1 (C37H60N6O7S): cyclic hexapeptide isolated from ascidian Lissoclinum patella
<none> Esi+ 2.967	S3B-42	4.1656e-24
C16 H2 Cl3 O S5	S3B-43	4.20314e-24
> limit Esi+ 3.4834542	S3B-44	5.5308e-24
C22 H40 O4	S3B-45	7.2301e-24
> limit Esi+ 3.4115455	S3B-46	8.17699e-24
12-(4-Aminophenyl)-10- hydroxy-6-(1-hydroxyethyl)-7, 9-dimethyl-12-oxo-2,4- dodecadienoic acid	S3B-47	9.30173e-24
2,9:3,16-Diepoxy-7,11- dihydroxy-4-asbestinanone; (7 a,1113)-form, 11-Butanoyl	S3B-48	1.01775e-23
Glycerol 1,3-dialkanoates; Glycerol 1,3-didecanoate	S3B-49	1.28652e-23
Pectenotoxin 1; Dihydro (?) Esi+ 3.4440908	S3B-50	1.46589e-23		dihydro-pectenotoxin 1 = PTX5 (C47H72O15):
C35 H58 N10 O	S3B-51	1.57451e-23
C39 H69 N Na O6	S3B-52	1.96804e-23
Zeaxanthin; (3R ,3'R , all-E )- form, Di-O -a-L- rhamnopyranoside	S3B-53	1.97047e-23		while zeaxanthin is a carotenoid found in most marine algae, the rhmanopyranoside had been isolated from Sulfolobus shibatae
> limit Esi+ 9.188363	S3B-54	2.02603e-23
C32 H43 N4 Na	S3B-55	2.14496e-23
> limit Esi+ 4.334636	S3B-56	2.14496e-23
> limit Esi+ 4.5729094	S3B-57	3.01381e-23
C35 H47 N8	S3B-58	3.13474e-23
> limit Esi+ 4.5729094 :1	S3B-59	3.36712e-23
Stigmasta-7,22-diene-2,3,5,6,9, 11,19-heptol; (2a,3i3,5ct,63,11ct, 24S )-form, 11,19-Di-Ac	S3B-60	5.48936e-23
> limit Esi+ 2.9722726 :0	S3B-61	8.01226e-23
> limit Esi+ 3.5489998	S3B-62	1.45363e-22
> limit Esi+ 4.6701818	S3B-63	1.6188e-22
Pectenotoxin 1; Dihydro (?) Esi+ 4.6496367	S3B-64	1.88368e-22
> limit Esi+ 4.154273	S3B-65	1.91208e-22
> limit Esi+ 3.5399091	S3B-66	2.88276e-22
C41 H55 N8 O3	S3B-67	3.11955e-22
C41 H55 N8 O3 Esi+ 3.560909	S3B-68	3.11955e-22
Cholestane-3,4,6,15,24-pentol; (31 ,4f3,5ct,63,15i3,24S )-form, 3-(2-O -Methyl-13-Dxylopyranoside)	S3B-69	6.04743e-22
> limit Esi+ 4.333091	S3B-70	7.80855e-22
> limit Esi+ 4.335364	S3B-71	1.07214e-21
Barrenazine A; 6',6,7',7- Tetradehydro (=Barrenazine B)	S3B-72	2.42651e-21		Barrenazine B (C24H38N4): isolated from an unidentified tunicate
Feigrisolide C	S3B-73	2.44358e-21		Feigrisolide C (C21H36O7): from a marine-derived Streptomyces sp.
Glycerol 1-alkanoates; Glycerol 1- (10-methyl-9Z -octadecenoate)	S3B-74	6.16111e-21
<none> Esi+ 3.6680908	S3B-75	6.16405e-21
> limit Esi+ 3.718727	S3B-76	7.88786e-21
> limit Esi+ 3.718727 :2	S3B-77	7.88786e-21
> limit Esi+ 3.5785449	S3B-78	8.67229e-21
> limit Esi+ 3.944818	S3B-79	9.90105e-21
Pinnatoxin D Esi+ 3.6697276	S3B-80	1.24314e-20		Pinnatoxin D: proven misidentification
Enterocin; 8-O -Eicosanoyl	S3B-81	1.3253e-20
> limit Esi+ 2.967	S3B-82	1.45487e-20
C39 H58 N2 Na O7	S3B-83	1.64832e-20
> limit Esi+ 5.423909	S3B-84	2.38813e-20
Pinnatoxin D	S3B-85	8.3028e-20		Pinnatoxin D: proven misidentification
> limit Esi+ 9.253909	S3B-86	1.37026e-19
> limit Esi+ 5.1013637	S3B-87	2.97981e-19
> limit Esi+ 3.5813634	S3B-88	4.47581e-19
C44 H57 N8 O3	S3B-89	5.0716e-19
> limit Esi+ 3.1102724	S3B-90	5.32587e-19
> limit Esi+ 4.704636 :3	S3B-91	7.88031e-19
> limit Esi+ 4.704636	S3B-92	7.9571e-19
> limit Esi+ 4.671636	S3B-93	1.04267e-18
> limit Esi+ 5.506909	S3B-94	1.96961e-18
> limit Esi+ 4.6723638	S3B-95	2.43845e-18
> limit Esi+ 8.048454	S3B-96	9.13767e-18
C21 H31 N3 Na O3	S3B-97	1.31915e-17
> limit Esi+ 4.1619997	S3B-98	1.49221e-17
> limit Esi+ 4.670909	S3B-99	1.49221e-17
C39 H53 N8 O4	S3B-100	2.21433e-17
6-Heptadecyl-1,2,4-benzenetriol; 10',11'-Didehydro(Z -), 1,2-di-Me ether	S3B-101	3.11695e-17
> limit Esi+ 3.570909	S3B-102	3.60877e-17
C21 H38 N6 O4	S3B-103	7.45683e-17
Loganic acid; 3'-Ac	S3B-104	7.99704e-17
C42 H57 N5 O7	S3B-105	9.93084e-17
13-Labdene-8,15-diol; (8ct,13 E)-form, 8-O-ct-LArabinopyranoside Esi+ 3.546818	S3B-106	1.23606e-16
> limit Esi+ 3.8536363	S3B-107	7.29552e-15
Geniposidic acid	S3B-108	1.46239e-14
C25 H54 N15 Na	S3B-109	2.37201e-13
Pectenotoxin 1; Dihydro (?)	S3B-110	1.3302e-11		dihydro-pectenotoxin 1 = PTX5 (C47H72O15): from Dinophysis fortii
C27 H54 N5 Na O	S3B-111	7.85619e-11
Pectenotoxin 1; Dihydro (?) Esi+ 3.8544998	S3B-112	8.57023e-11		dihydro-pectenotoxin 1 = PTX5 (C47H72O15): from Dinophysis fortii
> limit	S3B-113	7.83417e-10
2,3,5,14,20,22,26- Heptahydroxycholest-7-en-6-one	S3B-114	9.81204e-10
C33 H65 N O6 S	S3B-115	1.01006e-09
> limit Esi+ 6.846318	S3B-116	1.90994e-09
Okadaic acid	S3B-117	2.9579e-09
Ergostane-3,4,6,8,15,24,28-heptol	S3B-118	5.69928e-09
> limit Esi+ 3.8258464	S3B-119	7.04934e-09
C45 H74 N2 Na O4	S3B-120	9.06467e-09
> limit Esi+ 5.1195836	S3B-121	9.23943e-09
C22 H39 N O3	S3B-122	1.16348e-08
> limit Esi+ 2.8090003	S3B-123	1.49953e-08
C40 H57 N O8	S3B-124	2.90424e-08
> limit Esi+ 7.766728	S3B-125	3.0561e-08
C20 H26 N7 O	S3B-126	3.4506e-08
> limit Esi+ 5.847545	S3B-127	3.7476e-08
9-Hydroxyheptadecanoic acid	S3B-128	4.6304e-08
Planaxool	S3B-129	7.36375e-08		Planaxool (C21H32O6): isolated from mollusc Planaxis sulcatus
C24 H45 N7 O3	S3B-130	8.49095e-08
> limit Esi+ 6.9591546	S3B-131	1.33439e-07
> limit Esi+ 5.682182	S3B-132	1.39497e-07
4-Hydroxybenzaldehyde; Butyl ether	S3B-133	1.72474e-07
> limit Esi+ 6.0851817	S3B-134	1.95699e-07
5,7,9,14,17-Eicosapentaenoic acid; (5E ,7Z ,9E ,14Z ,17Z )-form	S3B-135	2.02052e-07
> limit Esi+ 3.5551002	S3B-136	2.29604e-07
> limit Esi+ 6.6588564	S3B-137	2.50704e-07
Pyrophaeophorbide a; 3,7R , 5,11R -Tetramethyl-2E - hexadecenyl ester	S3B-138	2.52637e-07		Chlorophyll degradation product
> limit Esi+ 7.437409	S3B-139	3.67738e-07
Sigmosceptrellin D; Me ester	S3B-140	4.13299e-07		Sigmosceptrellin D; Me ester (C25H46O6): constituent of Sigmosceptrella sponge
Pectenotoxin 1; 43-Deoxy Esi+ 4.353231	S3B-141	5.15066e-07		43 deoxy-pectenotoxin 1 (=PTX2) (C47H70O14): from Dinophysis fortii, from D. acuta
> limit Esi+ 9.402409	S3B-142	1.2945e-06
Asteriacerebroside F Esi+ 8.798863	S3B-143	1.39068e-06
> limit Esi+ 7.8892727	S3B-144	1.39068e-06
Asteriacerebroside F	S3B-145	1.54488e-06		Asteriacerebroside F (C47H91NO10): glycosphingolipid isolated from the starfish Asterias amurensis
> limit Esi+ 8.191428	S3B-146	1.59505e-06
5,8-Epidioxystigmasta-6,22-dien- 3-ol; (3i3,5ct,8ct,22E ,24?)-form, 22,23-Dihydro	S3B-147	1.6977e-06
<none> Esi+ 6.3482666	S3B-148	1.79593e-06
C42 H70 N9 Na	S3B-149	1.79593e-06
> limit Esi+ 6.9926147	S3B-150	1.95793e-06
> limit Esi+ 6.595937	S3B-151	1.96294e-06
C21 H42 N O	S3B-152	2.79873e-06
Glycerol 1-alkanoates; Glycerol 1- (8,9-methylenehexadecanoate)	S3B-153	3.04087e-06
> limit Esi+ 6.6736145	S3B-154	3.17429e-06
Polyprenol; Betulaprenol 7, O -[ii-D-Xylopyranosyl-(1?*4)-3 -D-xylopyranoside]	S3B-155	3.6137e-06
> limit Esi+ 6.4123187	S3B-156	3.98586e-06
11,15-Dihydroxy-9-oxo-5,13- prostadienoic acid; (5Z ,8R ,11S , 12R ,13E ,15S )-form	S3B-157	4.01407e-06
2-Amino-4-hexadecene-1,3- diol; (2S ,3R ,4E )-form, N - Hexadecanoyl, 1-O - -Dgalactopyranoside	S3B-158	4.43841e-06
Glycerol 1-alkanoates; Glycerol 1- (9Z -octadecenoate), 2-Ac	S3B-159	4.66071e-06
> limit Esi+ 6.703091	S3B-160	5.09656e-06
C41 H59 N O11	S3B-161	5.32815e-06
> limit Esi+ 6.3833637	S3B-162	6.00499e-06
> limit Esi+ 7.9526362	S3B-163	7.82175e-06
C29 H53 N8 O	S3B-164	8.43827e-06
> limit Esi+ 5.769316	S3B-165	1.10435e-05
C34 H67 N O7 Esi+ 6.7478175	S3B-166	1.24067e-05
> limit Esi+ 8.012693	S3B-167	1.47302e-05
Phaeophytin a; 10R -Hydroxy	S3B-168	2.17769e-05		Phaeophytin a; 10R -Hydroxy (C55H74N4O6): isolated from the tunicate Trididemnum solidum
> limit Esi+ 7.0171814	S3B-169	2.18663e-05
Ergostane-3,20,22,25-tetrol; (3ct, 5a,20?,22?,24?)-form, 22,25-DiAc	S3B-170	2.63249e-05
11,14-Epoxy-7-hydroxy-4,8(17)- briaradien-18,7-olide; (4E ,7ctOH , 1113,1413)-form, Me ether	S3B-171	2.72654e-05
> limit Esi+ 5.834555	S3B-172	3.18558e-05
2-Amino-4-hexadecene-1,3- diol; (2S ,3R ,4E )-form, N - Octadecanoyl, 1-O - -Dgalactopyranoside	S3B-173	3.41069e-05
> limit Esi+ 10.32625	S3B-174	3.59755e-05
> limit Esi+ 5.7469287	S3B-175	3.76379e-05
26,27-Dinorergost-22-ene-3,6,15, 25-tetrol	S3B-176	3.89316e-05
Cephalostatin 6	S3B-177	3.9997e-05		Cephalostatin 6 (C53H70N2O10): diseroidal alkaloid isolated from the Indian ocean marine worm Cephalodiscus gilchristi (active against P388 cells)
> limit Esi+ 5.746857	S3B-178	4.25244e-05
Phloeodictyne A; Phloeodictyne 4,7a	S3B-179	4.28592e-05		Phloeodictyne A; Phloeodictyne 4,7a (C24H45N5O): isolated from New Caledonian sponges
Cephalostatin 2; 1α-Methoxy (= cephalostatin 10)	S3B-180	4.58159e-05		Cephalostatin 10 (C55H76N2O12): diseroidal alkaloid isolated from the Indian ocean marine worm Cephalodiscus gilchristi (active against P388 cells)
C34 H67 N O7	S3B-181	5.15496e-05
Hymenamide H	S3B-182	5.86796e-05		Hymenamide H (C47H69N9O0): octapeptide isolated from the marine sponge Hymeniacidon sp.
22,25-Epoxy-24-methylfurostane- 3,11,20-triol	S3B-183	6.07442e-05
3-Hydroxy-12-oleanen-28-oic acid; 3ct-form, Ac	S3B-184	6.56453e-05
Phaeophorbide a; 3-Me ester Esi+ 6.4	S3B-185	6.56453e-05		Chlorophyll degradation product
1(10),5-Germacradien-4-ol; (1(10)E ,4a,5E )-form, O - -D- Glucopyranoside	S3B-186	6.86699e-05
Heteroxanthin	S3B-187	6.88791e-05		Heteroxanthin (C40H56O4): carotenoid constituent of Vaucheria and Botrydium spp. and Mytilus edulis
Glycerol 1-alkanoates; Glycerol 1- octadecanoate	S3B-188	7.02421e-05
> limit Esi+ 6.131928	S3B-189	7.47581e-05
6,10-Dihydroxy-3,7,11,15(17)- cembratetraen-16,2-olide; (1R ,2S ,3E ,6S ,7E ,10S ,11E )-form, Di-Ac	S3B-190	8.122e-05
5,8-Epidioxyergosta-6,22-dien-3- ol; (313,5ct,8x,22E ,24R )-form, 3- O -3-D-Glucopyranoside	S3B-191	8.122e-05
Myriaporone 2	S3B-192	8.122e-05		Myriaporone 2 (C21H32O7): isolated from the bryozoan Myriapora truncata
> limit Esi+ 7.461455	S3B-193	9.19527e-05
> limit Esi+ 5.613	S3B-194	9.418e-05
10,15-Eicosadienoic acid	S3B-195	0.000110706
C15 H43 N11 O6	S3B-196	0.000112306
<none>	S3B-197	0.000118539
> limit Esi+ 5.644773	S3B-198	0.00012023
> limit Esi+ 9.738363	S3B-199	0.000132846
Phaeophorbide a; 3-Me ester	S3B-200	0.000132846		Chlorophyll degradation product
> limit Esi+ 5.6260915	S3B-201	0.000132846
C21 H29 N5 Na O7	S3B-202	0.000143579
C8 H4 Na O19 S2	S3B-203	0.000144316
Agelaxanthin C; 19-Me ether (=Agelaxanthin B)	S3B-204	0.00015045		Agelaxanthin B (C42H58O5): isolated from sponge Agelas schmidtii
Glycerol 1,2-dialkanoates;Glycerol 1,2-dihexadecanoate, 3- O -3-D-Glucopyranoside	S3B-205	0.000150498
> limit Esi+ 6.489072	S3B-206	0.000152105
C17 H47 N11 O7	S3B-207	0.00016391
C41 H71 N11 O3	S3B-208	0.000168911
3,4-Didehydro-y,x-carotene; (6 S )-form	S3B-209	0.000174342		3,4-Didehydro-y,x-carotene; (6 S )-form: carotenoid
C13 H39 N11 O5	S3B-210	0.000176387
Rubrolide E; 3',3,5- Tribromo	S3B-211	0.000179333		Rubrolide J (C17H9BR3O4): constituent of the tunicate Synoicum blochmanni
C30 H49 N O6	S3B-212	0.000179333
C30 H49 N O6 Esi+ 3.584136	S3B-213	0.000179333
C9 H4 Na O25	S3B-214	0.000182596
C25 H54 N5 Na	S3B-215	0.000185959
C15 H41 N13 O S	S3B-216	0.000185959
C27 H55 O10	S3B-217	0.000195574
C43 H52 N7 O	S3B-218	0.000234331
<none> Esi+ 5.5405006	S3B-219	0.000253193
C41 H65 N11 O	S3B-220	0.000262158
3,4-Epoxy-7,13-dihydroxy-8(19), 15(17)-cembradien-16,14-olide	S3B-221	0.000285068
> limit Esi+ 6.7286363	S3B-222	0.000310422
> limit Esi+ 8.410592	S3B-223	0.000350565
20(29)-Lupen-3-ol; 3I3-form, 3-O -[1-D-Xylopyranosyl-(1? 4)-a-L-rhamnopyranoside]	S3B-224	0.000368598
> limit Esi+ 7.3776436	S3B-225	0.000377245
C37 H67 N6 Na O3	S3B-226	0.000472647
Sipholenol A; 19-O -a-L- Rhamnopyranoside	S3B-227	0.000498386		Sipholenol A: triterpenoid from the sponge Siphonochalina siphonella
> limit Esi+ 6.1833005	S3B-228	0.000506993
> limit Esi+ 5.672363	S3B-229	0.000519425
> limit Esi+ 6.0806813	S3B-230	0.000523514
C40 H55 N7 Na	S3B-231	0.000550724
Ergost-5-ene-3,16,25-triol; (313,16 13,24S )-form, 3-O -a-L- Fucopyranoside	S3B-232	0.000588165
C29 H63 N10 Na O2 S	S3B-233	0.000622404
C32 H57 N O9	S3B-234	0.000626616
> limit Esi+ 7.5866	S3B-235	0.00063148
7,12-Dihydroxy-3-oxocholan-24- oic acid; (513,7ct,12ct)-form, Me ester	S3B-236	0.000673704
> limit Esi+ 7.314501	S3B-237	0.000765941
6-(2,4-Diethyl-1,5-octadienyl)- 4,6-diethyl-1,2-dioxane-3- acetic acid; (3?,6?,10?,11E)- form	S3B-238	0.000777333
C27 H55 N8	S3B-239	0.000804473
13-Labdene-8,15-diol; (8ct,13 E)-form, 8-O-ct-LArabinopyranoside	S3B-240	0.000825333
C25 H46 N5 Na O2	S3B-241	0.000863431
<none> Esi+ 6.625467	S3B-242	0.000938925

## Sheet: S3c
Table S3C: Compounds common to both species of Dinophysis, differentially expressed (fold-change > 2, p < 0.001) with interaction between "prey origin" and "species" (ESI+)
Compound	ID	p (Corr) (Prey-origin-Species)
C25 H54 N15 Na	S3C-1	3.37924e-12
C27 H54 N5 Na O	S3C-2	3.55486e-09
C33 H65 N O6 S	S3C-3	7.82354e-08
Pectenotoxin 1; Dihydro (?) Esi+ 3.4440908	S3C-4	1.69076e-05		dihydro-pectenotoxin 1 = PTX5 (C47H72O15): from Dinophysis fortii
C21 H29 N5 Na O7	S3C-5	0.000135654
11,14-Epoxy-7-hydroxy-4,8(17)- briaradien-18,7-olide; (4E ,7ctOH , 1113,1413)-form, Me ether	S3C-6	0.000149735
Glycerol 1,3-dialkanoates; Glycerol 1,3-didecanoate	S3C-7	0.00017009
Stigmast-5-en-3-ol; (313,24R )- form, O -[3-D-Glucopyranosyl-(1 ?*4)-ct-L-arabinopyranoside]	S3C-8	0.000227961
Phaeophorbide a; 3-Me ester Esi+ 6.4	S3C-9	0.000227961		Chlorophyll degradation product
> limit Esi+ 7.0957274	S3C-10	0.000227961
> limit Esi+ 3.4092727	S3C-11	0.000455293
> limit Esi+ 3.4078178	S3C-12	0.000455293
C28 H49 N O6 Esi+ 3.551273	S3C-13	0.000504545
> limit Esi+ 4.335364	S3C-14	0.000504826
2-(Aminomethyl)-2-propenoic acid; N -(2-Oxohexadecanoyl), Me ester	S3C-15	0.000643912
> limit Esi+ 6.8737273	S3C-16	0.000643912
> limit Esi+ 4.333091	S3C-17	0.000643912
Pectenotoxin 1; Dihydro (?) Esi+ 4.334636	S3C-18	0.000691886		dihydro-pectenotoxin 1 = PTX5 (C47H72O15): from Dinophysis fortii
Pectenotoxin 1; Dihydro (?) Esi+ 4.6496367	S3C-19	0.000691886		dihydro-pectenotoxin 1 = PTX5 (C47H72O15): from Dinophysis fortii
C28 H49 N O6	S3C-20	0.000691886
> limit Esi+ 4.334636	S3C-21	0.000844905

## Sheet: S4a
Table S4A: Compounds common to both species of Dinophysis, differentially expressed (fold-change > 2, p < 0.001) as a function of "prey origin" (ESI-)
Compound	ID	p (Corr) (Prey-origin)
C33 H65 N O6 S Esi- 5.9614167	S4A-1	1.56e-22
C29 H51 N22 S	S4A-2	5.69e-22
> limit Esi- 6.2458997	S4A-3	1.87e-21
2-Amino-1,3,4-octadecanetriol; (2S ,3S ,4R )-form, N - Hexadecanoyl, 4-sulfate Esi- 6.2082496	S4A-4	2.74e-21
> limit Esi- 6.2466993	S4A-5	2.74e-21
2-Amino-3-hydroxy-4- octadecene-1-sulfonic acid; (2 S ,3R )-form, N -Tetradecenoyl Esi- 5.5055995	S4A-6	4.27e-21
C35 H69 N O6 S	S4A-7	7.63e-21
> limit Esi- 6.4638	S4A-8	9.81e-21
C30 H46 N4 O	S4A-9	3.44e-20
Antibiotic S 39163F1; 1- Demethyl Esi- 6.1137	S4A-10	3.19e-19		Lactone antibiotic, produced by fungus Microsphaeropsis sp.
2-Amino-3-hydroxy-4- octadecene-1-sulfonic acid; (2 S ,3R )-form, N -Hexadecanoyl Esi- 6.6955	S4A-11	4.42e-19
Spirolide E; 2,3-Dihydro	S4A-12	1.05e-18		clarified as misidentification
C25 H52 N22	S4A-13	3.95e-18
C23 H34 N4 Na O3	S4A-14	5.49e-18
C20 H37 N13 Na O4	S4A-15	5.49e-18
> limit Esi- 3.3326666	S4A-16	2.64e-17
C39 H55 N2 Na O	S4A-17	2.64e-17
> limit Esi- 3.4742	S4A-18	2.64e-17
> limit Esi- 6.0031996	S4A-19	2.64e-17
C19 H18 N13 O5	S4A-20	2.84e-17
C32 H21 N15 Na O2	S4A-21	7.61e-17
C24 H50 N21 Na O	S4A-22	7.79e-17
> limit Esi- 6.5895	S4A-23	1.27e-16
Variabilin?; (6E ,10E ,15R ,16Z )- form, 18-(14-Methylhexadecanoyl)	S4A-24	3.56e-16		sponge metabolite
> limit Esi- 3.0041666	S4A-25	3.56e-16
C16 H4 N5 O	S4A-26	4.72e-16
> limit Esi- 3.599	S4A-27	6.94e-16
C19 H3 N2 Na O26	S4A-28	8e-16
C30 H56 N7 O2 S	S4A-29	8.42e-16
Ergosta-7,22-diene-3,23-diol; (3i, 22Z ,24R )-form, 23-Sulfate	S4A-30	8.58704e-16
C32 H50 N3 O9	S4A-31	1.96e-15
Stigmast-5-en-3-ol; (313,24R )- form, O -Sulfate	S4A-32	3.59e-15
Ergosta-5,22-dien-3-ol; (313,22E , 24?)-form, 3-O -Sulfate	S4A-33	3.9e-15
Antibiotic S 39163F1; 1- Demethyl	S4A-34	3.94e-15		Lactone antibiotic, produced by fungus Microsphaeropsis sp.
C17 H3 N5 Na O23 S	S4A-35	4.62e-15
C28 H56 N15 Na	S4A-36	4.62e-15
Chartarin; 10-O -[6-Deoxy-3-O -methyl-ct-D-galactopyranosyl- (1?*2)-6-deoxy-3-D- galactopyranoside]	S4A-37	4.77e-15
Denticulatin A	S4A-38	8.15e-15		Denticulatin A (C23H40O5): metabolite of mollusc Siphonaria denticulata (ichthyotoxin)
C35 H64 N5 Na O3 S	S4A-39	9.2e-15
> limit Esi- 1.6443334	S4A-40	1.44e-14
C28 H58 N15 Na	S4A-41	1.57e-14
C35 H65 N O5 S	S4A-42	1.7e-14
> limit Esi- 7.9545	S4A-43	1.95e-14
Sulfobacin A; 4,5-Didehydro(E-) Esi- 6.211083 (= Flavocristamide A)	S4A-44	3.07e-14		Flavocristamide A (C34H67NO6S): produced by a Flavobacterium in the marie bivalve Cristaria plicata
C30 H59 N4 Na O2 S	S4A-45	1.83e-13
> limit Esi- 7.5085	S4A-46	2.07e-12
C30 H46 N3 O7	S4A-47	2.43e-12
> limit Esi- 3.6046665	S4A-48	2.11e-10
C23 H54 N18 Na	S4A-49	7.2e-08
Penaeustatins; Penaeustatin16	S4A-50	9.15e-08		Penaeustatin16 (C38H55N9O11): peptides of the allostatin superfamily, isolated from the CNS of the tiger prawn Penaeus monodon
> limit Esi- 6.245	S4A-51	9.54e-08
C27 H46 N3 O3 S	S4A-52	1.29e-07
C22 H28 N5 O6	S4A-53	1.35e-07
Sulfobacin A; 4,5-Didehydro(E-) Esi- 6.211083 (= Flavocristamide A)	S4A-54	2e-07		Flavocristamide A (C34H67NO6S): produced by a Flavobacterium in the marie bivalve Cristaria plicata
2-Amino-3-hydroxy-4- octadecene-1-sulfonic acid; (2 S ,3R )-form, N -Tetradecanoyl Esi- 6.1705	S4A-55	2.18e-07
2-Amino-3-hydroxy-4- octadecene-1-sulfonic acid; (2 S ,3R )-form, N -Tetradecanoyl	S4A-56	2.18e-07
Zamamistatin	S4A-57	2.73e-07		Zamamistatin (C18H18Br4N2O6): antibiotic isolated from the sponge Pseudoceratina purpurea
C17 H N2 Na O28	S4A-58	2.78e-07
C33 H67 N O6 S	S4A-59	2.83e-07
C13 H3 N5 Na O26 S	S4A-60	3.53571e-07
C36 H63 N7 O S	S4A-61	6.38e-07
> limit Esi- 7.681273	S4A-62	6.45e-07
C33 H65 N O6 S	S4A-63	7.49e-07
C34 H55 N13 O	S4A-64	1.2e-06
C32 H61 N8 O S	S4A-65	1.95e-06
Antimycin A; Antimycin A1	S4A-66	2.77e-06		Antimycin A1: macrolide antibiotic complex, produced by Streptomyces
C34 H65 N6 Na O2 S2	S4A-67	2.91e-06
2-Amino-1,3,4-octadecanetriol; (2S ,3S ,4R )-form, N - Hexadecanoyl, 4-sulfate	S4A-68	5.93e-06
C29 H51 N7 Na	S4A-69	6.58e-06
8-Hydroxy-6-methyl-2,4- octadienoic acid	S4A-70	6.78e-06
C27 H56 N15 Na	S4A-71	6.78e-06
C23 H46 N27 Na	S4A-72	7.08e-06
Spongiaquinone; 1'-Deoxy, 2',5'- quinol, 11-chloro, 9(11)E-isomer	S4A-73	1.03e-05
Planaxool	S4A-74	1.03e-05		Planaxool (C21H32O6): isolated from mollusc Planaxis sulcatus
> limit Esi- 5.7468185	S4A-75	1.03e-05
C36 H65 N8 S	S4A-76	1.03e-05
C35 H68 N5 Na O S	S4A-77	1.15e-05
C31 H59 N7 O6 S	S4A-78	1.15e-05
C32 H60 N5 Na O S	S4A-79	1.25e-05
C42 H78 N10 O	S4A-80	1.34e-05
C38 H73 N4 Na O5	S4A-81	1.35e-05
Mycalamide A	S4A-82	1.35e-05
C35 H64 N2 Na O3 S	S4A-83	1.62e-05
C37 H68 N2 O7	S4A-84	1.8e-05
C36 H70 N5 Na O S	S4A-85	1.96e-05
Plakinamine A; 3-Epimer, 48- hydroxy, N 3,N 3-di-Me, N 30-oxide	S4A-86	1.99e-05
> limit Esi- 6.244	S4A-87	2.07e-05
Sulfobacin A	S4A-88	2.13e-05
Glycerol 1-alkanoates; Glycerol 1- (7Z ,10Z ,13Z -hexadecatrienoate), 3-O -?-DGalactopyranoside	S4A-89	2.25e-05
C34 H64 N2 Na O2 S	S4A-90	2.25001e-05
C25 H55 N11 O2	S4A-91	2.25e-05
Sulfobacin A; 4,5-Didehydro(E-) Esi- 6.5027	S4A-92	2.48e-05		Flavocristamide A (C34H67NO6S): produced by a Flavobacterium in the marie bivalve Cristaria plicata
C37 H49 N11 O4	S4A-93	2.5e-05
> limit Esi- 6.1151423	S4A-94	2.51e-05
Peroxyplakoric acid A1	S4A-95	2.64e-05
> limit Esi- 8.992858	S4A-96	2.82e-05
Myriastramide C	S4A-97	2.85e-05
C16 H21 N13 Na	S4A-98	2.85e-05
C28 H58 N15 Na Esi- 8.4052	S4A-99	2.89e-05
> limit Esi- 6.1151423 :24	S4A-100	2.93e-05
> limit Esi- 3.8131819	S4A-101	2.93e-05
C30 H53 N4 Na O5 S	S4A-102	2.93e-05
2-Amino-3-hydroxy-4- octadecene-1-sulfonic acid; (2 S ,3R )-form, N -Tetradecenoyl	S4A-103	3e-05
C13 H21 N14 Na O12	S4A-104	3.14e-05
C15 H N4 Na O28 S	S4A-105	3.37e-05
C41 H58 N9 Na	S4A-106	3.43e-05
C31 H62 O6 S	S4A-107	3.6e-05
Plakortether B; 10R -Chloro (=Plakortether C)	S4A-108	3.9e-05		Plakortether (C18H33ClO4): isolated from Plakortis simplex
C33 H67 O11 S	S4A-109	3.91e-05
Planaxool Esi- 2.399	S4A-110	4.04e-05		Planaxool (C21H32O6): isolated from mollusc Planaxis sulcatus
C34 H63 N8 S	S4A-111	4.05e-05
> limit Esi- 6.2451534 :3	S4A-112	4.2e-05
C31 H55 N14 S	S4A-113	4.35e-05
C31 H40 N8	S4A-114	4.45e-05
<none>	S4A-115	4.45e-05
2-Amino-3-hydroxy-4- octadecene-1-sulfonic acid; (2 S ,3R )-form, N -3- Hexadecenoyl	S4A-116	4.45e-05
C35 H67 N7 O6 S	S4A-117	4.45e-05
C37 H67 N13	S4A-118	4.5e-05
C28 H29 N14 Na O	S4A-119	4.51e-05
> limit Esi- 6.2451534	S4A-120	4.50794e-05
> limit Esi- 4.816909	S4A-121	4.51e-05
C24 H54 N15 Na	S4A-122	4.51e-05
C19 H21 N15 Na O3	S4A-123	4.6e-05
Loganic acid; 6'-ct-D- Glucopyranosyl	S4A-124	4.63e-05
C33 H64 N4 Na O7 S	S4A-125	4.63e-05
> limit Esi- 7.6784997	S4A-126	4.63e-05
2-Amino-3-hydroxy-4- octadecene-1-sulfonic acid; (2 S ,3R )-form, N -Hexadecanoyl Esi- 7.3075333	S4A-127	4.66e-05
> limit Esi- 3.6234446	S4A-128	4.66e-05
Lobophorolide	S4A-129	4.88e-05		Lobophorolide (C42H70O12): sol. from the brown alga Lobophora variegata
Glycerol 1,2-dialkanoates;Glycerol 1,2-di-(9Z ,12Z - octadecadienoate), 3-Phosphate	S4A-130	5.16e-05
C34 H63 N8 O S	S4A-131	5.48e-05
> limit Esi- 3.6669998	S4A-132	5.49e-05
2-Amino-3-hydroxy-4- octadecene-1-sulfonic acid; (2 S ,3R )-form, N -Hexadecanoyl Esi- 6.8635993	S4A-133	5.61e-05
C31 H62 O7 S	S4A-134	6.01e-05
C32 H52 N5 Na O9	S4A-135	6.29e-05
C25 H31 N10 Na	S4A-136	6.33e-05
C21 H53 N28 Na	S4A-137	6.33e-05
Paciforgin	S4A-138	6.43e-05		Paciforgin (C21H34O8): Isol. from the coral Pacifigorgia sp.
Gorgiabisazulene	S4A-139	6.43e-05		Gorgiabisazulene (C31H32O2): Constit. of an Acalycigorgia sp.
> limit Esi- 5.0374546	S4A-140	6.43e-05
3',4',5,5',7-Pentahydroxy-3- methoxyflavone; 7-O -a-L- Rhamnopyranoside	S4A-141	6.43e-05
C24 H30 Cl N3 Na O2 S	S4A-142	6.43e-05
C30 H58 N5 Na O2 S	S4A-143	6.43e-05
2-Amino-3-hydroxy-4- octadecene-1-sulfonic acid; (2 S ,3R )-form, N -Hexadecanoyl Esi- 6.395077	S4A-144	6.43e-05
Salinamide E	S4A-145	6.8e-05		Salinamide E (C43H62N6O12): Prod. by Streptomyces sp. CNB-091 from a jellyfish
> limit Esi- 5.3462725	S4A-146	6.8e-05
> limit Esi- 3.6661818 :6	S4A-147	6.86e-05
> limit Esi- 3.6661818	S4A-148	6.86e-05
C11 H28 N12 Na	S4A-149	6.86e-05
C18 H19 N12 Na O2	S4A-150	6.86297e-05
> limit Esi- 3.6326666	S4A-151	6.94e-05
C27 H38 N12 Na	S4A-152	7.38e-05
> limit Esi- 8.086333	S4A-153	7.51e-05
C13 H15 N17 Na O11	S4A-154	7.79e-05
C24 H N Na O24 S	S4A-155	7.8e-05
2-Amino-3-hydroxy-4- octadecene-1-sulfonic acid; (2 S ,3R )-form, N -Hexadecanoyl	S4A-156	7.8e-05
C27 H25 N6 Na O3	S4A-157	7.82e-05
Bromophycolide F	S4A-158	7.86e-05		Bromophycolide F (C27H37BrO5): Constit. of red alga Callophycus serratus
2-Methyl-32,33,34,35- bacteriohopanetetrol; (213,32 ,33?,34?)-form, 35-O -a-DAltruronopyranoside	S4A-159	8.11e-05
C6 H3 Na O17	S4A-160	8.19e-05
Pectenotoxin 1; Dihydro (?)	S4A-161	8.25e-05		dihydro-pectenotoxin 1 = PTX5 (C47H72O15): from Dinophysis fortii
C19 H26 N7 O13 S	S4A-162	8.25e-05
C29 H18 N19	S4A-163	8.25e-05
C36 H20 N6 O2	S4A-164	8.25e-05
> limit Esi- 7.2883334	S4A-165	8.25e-05
> limit Esi- 6.1062856	S4A-166	8.28e-05
Reticulatate; Me ester, salt with Dehydroluffariellolide diacid;MXL81-G	S4A-167	8.35e-05		Reticulatate (C19H15N2O2): alkaloid from the sponges Fascaplysinopsis reticulata and a Thorectandra sp.
> limit Esi- 3.7986667	S4A-168	8.35e-05
C23 H21 N19 Na O3	S4A-169	8.35e-05
> limit Esi- 3.488111	S4A-170	8.35e-05
> limit Esi- 7.0811114	S4A-171	8.35e-05
C12 H15 N11 Na O20	S4A-172	8.35e-05
C33 H58 N12 O	S4A-173	8.35e-05
C22 H50 N15 Na	S4A-174	8.45e-05
C26 H36 N24	S4A-175	8.45e-05
> limit Esi- 6.204222	S4A-176	8.45e-05
C18 H11 N12 Na O15	S4A-177	8.45e-05
> limit Esi- 8.4697275	S4A-178	8.62e-05
9,11,15-Trihydroxyprosta-5,13- dienoic acid; (5Z ,8R ,9S ,11R ,12 R ,13E ,15S )-form, 11-Ac	S4A-179	8.62e-05
C33 H54 N16 O	S4A-180	8.62338e-05
C20 H3 N Na O26	S4A-181	8.69e-05
C13 H7 N5 Na O26 S	S4A-182	8.79e-05
C19 H11 N12 Na O14	S4A-183	8.85e-05
> limit Esi- 3.488111 :10	S4A-184	8.86e-05
C18 H3 N Na O28 S	S4A-185	8.99e-05
> limit Esi- 4.088	S4A-186	9.06e-05
C13 H5 N5 Na O28	S4A-187	9.08e-05
C24 H N3 Na O22	S4A-188	9.13e-05
> limit Esi- 7.0005994	S4A-189	9.13e-05
> limit Esi- 4.272616 :18	S4A-190	9.13e-05
C19 H5 N2 Na O26	S4A-191	9.16e-05
> limit Esi- 6.629067	S4A-192	9.16e-05
> limit Esi- 3.5802221	S4A-193	9.73e-05
> limit Esi- 3.579333	S4A-194	9.76e-05
> limit Esi- 6.5703335	S4A-195	9.86e-05
> limit Esi- 5.527637	S4A-196	9.9e-05
C18 H N Na O30	S4A-197	9.9e-05
C16 H3 N4 Na O25 S2	S4A-198	9.9e-05
Stigmast-5-en-3-ol; (313,24R )- form, O -[3-D-Fructofuranosyl-(2 ?*1)-ct-D-glucopyranos-3-yl] ether	S4A-199	0.000103
> limit Esi- 4.1483846	S4A-200	0.000106
C14 H6 Cl2 O7 S	S4A-201	0.000107
> limit Esi- 4.9497776	S4A-202	0.000107
C41 H59 N10 Na	S4A-203	0.000107
C29 H53 N23	S4A-204	0.000108
> limit Esi- 5.199286	S4A-205	0.00011
> limit Esi- 4.1464615	S4A-206	0.00011
C18 H2 Cl3 N3 Na	S4A-207	0.000111
> limit Esi- 4.272616	S4A-208	0.000113137
Okadaic acid; 7-Hydroxy-4- methyl-2-methylene-4E - heptenyl ester	S4A-209	0.000114
> limit Esi- 4.1502304 :19	S4A-210	0.000114
C12 H19 N7 Na O19	S4A-211	0.000114
> limit Esi- 4.1502304	S4A-212	0.000114
> limit Esi- 4.1496153	S4A-213	0.000116
C32 H53 N4 Na O7 S	S4A-214	0.000116
> limit Esi- 4.273231	S4A-215	0.000116
> limit Esi- 4.1502304 :14	S4A-216	0.000116
C37 H68 N5 Na	S4A-217	0.000116
C40 H73 N4 O8	S4A-218	0.000116
> limit Esi- 4.1489997	S4A-219	0.000118
> limit Esi- 4.1496153 :11	S4A-220	0.000118
> limit Esi- 4.1502304 :17	S4A-221	0.000118
> limit Esi- 5.5948887	S4A-222	0.000118
> limit Esi- 9.340555	S4A-223	0.000118
Amphidinol 7	S4A-224	0.000119		Amphidinol 7 (C59H100O23S): Constit. of Amphidinium klebsii
> limit Esi- 5.546111	S4A-225	0.000119
> limit Esi- 8.067778	S4A-226	0.000119
> limit Esi- 9.342556	S4A-227	0.000119
> limit Esi- 4.149692	S4A-228	0.000119
C26 H48 N5 Na O4	S4A-229	0.000123
> limit Esi- 2.9930003	S4A-230	0.000124
Micropeptin 88Y	S4A-231	0.000125		Micropeptin 88Y (C52H74N8O14): depsipeptide antibiotic, Prod. by Microcystis aeruginosa NIES-88
C17 H32 N20	S4A-232	0.000126
> limit Esi- 4.1489997 :16	S4A-233	0.000126
1-Bromo-3,4,7,8-tetrachloro-3, 7-dimethyl-1,5-octadiene; (1E ,3R ,4S ,5E ,7S )-form	S4A-234	0.000126
C24 H50 N4 O	S4A-235	0.000127
Bastaxanthol; 16'-Deoxy, 3'β-alcohol, 3-O-sulfate	S4A-236	0.000128		Bastaxanthin C2 (C40H54O7S): carotenoid sulfate, Isol. From marine sponge Ianthella basta
> limit Esi- 4.1522303	S4A-237	0.000128022
C26 H26 N5 O6	S4A-238	0.000128
> limit Esi- 3.189111	S4A-239	0.000134
C28 H38 N18 Na	S4A-240	0.000136
> limit Esi- 7.3820004	S4A-241	0.000136
C14 H23 N15 Na O4	S4A-242	0.000139
C16 H3 N2 Na O29 S	S4A-243	0.000139
Reticulatate; Me ester, salt with Dehydroluffariellolide diacid;MXL81-G Esi- 3.2056668	S4A-244	0.000139		Reticulatate (C19H15N2O2): alkaloid from the sponges Fascaplysinopsis reticulata and a Thorectandra sp.
> limit Esi- 7.3894444	S4A-245	0.000142
C22 H52 N18 Na	S4A-246	0.000143
C25 H42 N12 Na	S4A-247	0.000144
> limit Esi- 7.209223	S4A-248	0.000144
> limit Esi- 7.5440006	S4A-249	0.000145
> limit Esi- 7.3885555	S4A-250	0.000148
> limit Esi- 4.160182	S4A-251	0.000155
C21 H51 N23 Na	S4A-252	0.000162
C28 H43 N11 O2	S4A-253	0.000162
> limit Esi- 3.500875	S4A-254	0.000162
C37 H59 N11 Na O	S4A-255	0.000162
> limit Esi- 9.928778	S4A-256	0.000171
Okadaic acid	S4A-257	0.000174
3,7,11-Trihydroxycholan-24-oic acid; (3a,513,7a,11a)-form, Taurine amide	S4A-258	0.000178
Theopederin G	S4A-259	0.000181		Theopederin G (C30H47NO11): Isol. from the sponge Theonella swinhoei
Bistramide A; 39-Ketone	S4A-260	0.000189		Bistramide C (C40H66N2O8): Isol. from tunicate Lissoclinum bistratum
Okadaic acid; 35R -Methyl, 14,15-dihydro	S4A-261	0.00019		14,15-Dihydro dinophsistoxin 1 (C45H72O13): isolated from a sponge of the Phakellia sp.
> limit Esi- 2.2226362	S4A-262	0.000191
> limit Esi- 6.251	S4A-263	0.0002
C21 H26 N8 O6	S4A-264	0.000201
C34 H36 N15	S4A-265	0.000202
> limit Esi- 8.471272	S4A-266	0.000235
> limit Esi- 8.289556	S4A-267	0.000242523
Sulfobacin A Esi- 6.908428	S4A-268	0.000262		Sulfobacin A (C34H69O6S): Prod. by Chryseobacterium sp. NR 2993 and from a Flavobacterium sp. in the marine bivalve Cristaria plicata
> limit Esi- 8.241777	S4A-269	0.000265
2-Amino-1,3,4-octadecanetriol; (2S ,3S ,4R )-form, N - Hexadecanoyl, 4-sulfate Esi- 6.7729554	S4A-270	0.000266
Plakortether B; 10-Oxo	S4A-271	0.000272
17,18-Epoxy-1(19),6,10(17),13- xenicatetraene-5,8,11,12,18- pentol	S4A-272	0.000287
> limit Esi- 5.6	S4A-273	0.000289
Fuscoatroside	S4A-274	0.000301		Fuscoatroside (C38H62O10): Metab. of Chaetomium sp. No. 217, Humicola fuscoatra and the marine-derived Humicola grisea G 101/26
10-Aromadendranol; (1ct,4a,5 13,6a,7a,10a)-form, O -[2-	S4A-275	0.000313
2-Amino-1,3,4-octadecanetriol; (2S ,3S ,4R )-form, N - Hexadecanoyl, 4-sulfate Esi- 6.6610003 :5	S4A-276	0.000314
Sulfobacin A; 4,5-Didehydro(E-) Esi- 6.3111115	S4A-277	0.000314		Flavocristamide A (C34H67NO6S): produced by a Flavobacterium in the marie bivalve Cristaria plicata
C28 H35 Na O	S4A-278	0.000322
2-Amino-1,3,4-octadecanetriol; (2S ,3S ,4R )-form, N - Hexadecanoyl, 4-sulfate Esi- 6.6610003	S4A-279	0.000322
> limit Esi- 8.408819	S4A-280	0.000324
C33 H45 N11 Na	S4A-281	0.000348
C21 H14 N14 O9	S4A-282	0.000348
> limit Esi- 8.112819	S4A-283	0.000364
C30 H55 N8 S	S4A-284	0.000364
> limit Esi- 8.112819 :7	S4A-285	0.000364
Sulfobacin A Esi- 6.4132266	S4A-286	0.000367		Sulfobacin A (C34H69O6S): Prod. by Chryseobacterium sp. NR 2993 and from a Flavobacterium sp. in the marine bivalve Cristaria plicata
C33 H54 O10	S4A-287	0.000372
> limit Esi- 6.9660907	S4A-288	0.000372
> limit Esi- 3.4742305	S4A-289	0.000378
C15 H12 N O2 S	S4A-290	0.000393
2-Amino-4,8-octadecadiene-1, 3-diol; (2S ,3R ,4E ,8E )-form, N -Me, N-octadecanoyl, 1-O-sulfate	S4A-291	0.000413
> limit Esi- 3.4742305 :12	S4A-292	0.000437
C32 H42 N O5	S4A-293	0.000454
Protoporphyrin; Sn complex	S4A-294	0.000461		Chlorophyll derivative
3',4',5,5',7-Pentahydroxy-3- methoxyflavone; 7-O -a-L- Rhamnopyranoside Esi- 4.160182	S4A-295	0.000478
> limit Esi- 3.472923	S4A-296	0.000478
> limit Esi- 7.0968885	S4A-297	0.000520462
C19 H N Na O29 Esi- 4.8679996	S4A-298	0.000557
> limit Esi- 5.748455	S4A-299	0.00056
C19 H18 N15 O	S4A-300	0.000582
Dictyonamide A	S4A-301	0.000589		Dictyonamide A (C63H108N12O15): Isol. from a marine fungus (KO63) separated from the red alga Ceratodictyon spongiosum
> limit Esi- 6.9690905	S4A-302	0.000606
C24 H18 N12	S4A-303	0.000644
> limit Esi- 4.160182 :8	S4A-304	0.00071
> limit Esi- 7.49991	S4A-305	0.000712
C25 H46 N27 O	S4A-306	0.000738
C40 H63 N2 O2	S4A-307	0.000748
C24 H20 N10 O13	S4A-308	0.000751
Quercetin 3-glycosides; Monosaccharides, 3-O -(6-O - Butyl-13-D-glucuronopyranoside)	S4A-309	0.000759
C37 H48 N15 Na	S4A-310	0.000759
> limit Esi- 6.2443333	S4A-311	0.000802
C28 H50 N5 O12	S4A-312	0.000833
C27 H58 N15 Na	S4A-313	0.000837
C23 H54 N23 Na	S4A-314	0.00086
C23 H48 N21 Na	S4A-315	0.00088
> limit Esi- 3.2130003	S4A-316	0.00088
> limit Esi- 3.8206367	S4A-317	0.000891

## Sheet: S4b
Table S4B: Compounds common to both species of Dinophysis, differentially expressed (fold-change > 2, p < 0.001) as a function of "species" (ESI-)
Compound	ID	p (Corr) (Species)
Pectenotoxin 1; Dihydro (?)	S4B-1	7.04e-26		dihydro-pectenotoxin 1 = PTX5 (C47H72O15): from Dinophysis fortii
> limit Esi- 3.8131819	S4B-2	1.2e-25
3,7,11-Trihydroxycholan-24-oic acid; (3a,513,7a,11a)-form, Taurine amide	S4B-3	1.2e-25
C38 H73 N4 Na O5	S4B-4	5.24e-25
Salinamide E	S4B-5	5.24e-25
Planaxool	S4B-6	6e-25
> limit Esi- 8.471272	S4B-7	6e-25
8-Hydroxy-6-methyl-2,4- octadienoic acid	S4B-8	1.23e-24
C30 H53 N4 Na O5 S	S4B-9	1.23e-24
> limit Esi- 4.816909	S4B-10	1.23e-24
> limit Esi- 5.3462725	S4B-11	1.23e-24
> limit Esi- 8.4697275	S4B-12	1.23e-24
C21 H51 N23 Na	S4B-13	1.23e-24
Okadaic acid	S4B-14	1.23e-24
Plakortether B; 10-Oxo	S4B-15	1.23e-24
C33 H54 O10	S4B-16	1.23e-24
> limit Esi- 5.748455	S4B-17	1.23e-24
C31 H56 N3 O7	S4B-18	1.23e-24
C43 H72 O9	S4B-19	1.23e-24
C35 H52 N17	S4B-20	1.23e-24
> limit Esi- 8.456182	S4B-21	1.23e-24
> limit Esi- 5.527637	S4B-22	1.45e-24
C17 H32 N20	S4B-23	1.65e-24
C27 H38 N12 Na	S4B-24	1.77e-24
> limit Esi- 4.088	S4B-25	1.77e-24
C32 H52 N5 Na O9	S4B-26	1.88e-24
Geniposidic acid; 10-O -(3,4- Dihydroxy-E -cinnamoyl) Esi- 4.923	S4B-27	1.88e-24
Geniposidic acid; 10-O -(3,4- Dihydroxy-E -cinnamoyl)	S4B-28	1.88e-24
C42 H78 N10 O	S4B-29	1.96e-24
Mycalamide A	S4B-30	1.96498e-24
Plakinamine A; 3-Epimer, 48- hydroxy, N 3,N 3-di-Me, N 30-oxide	S4B-31	2.19e-24
C37 H49 N11 O4	S4B-32	2.19e-24
Planaxool Esi- 2.399	S4B-33	2.19e-24		Planaxool (C21H32O6): isolated from mollusc Planaxis sulcatus
C31 H40 N8	S4B-34	2.19e-24
> limit Esi- 8.408819	S4B-35	2.19e-24
C33 H45 N11 Na	S4B-36	2.19e-24
Paciforgin	S4B-37	2.24e-24
Okadaic acid; 7-Hydroxy-4- methyl-2-methylene-4E - heptenyl ester	S4B-38	2.27e-24
C26 H26 N5 O6	S4B-39	2.27e-24
> limit Esi- 3.2130003	S4B-40	2.27e-24
Glycerol 1-alkanoates; Glycerol 1- (7Z ,10Z ,13Z -hexadecatrienoate), 3-O -?-DGalactopyranoside	S4B-41	2.32e-24
C25 H31 N10 Na	S4B-42	2.32e-24
C51 H102 O	S4B-43	2.45e-24
C16 H21 N13 Na	S4B-44	2.77e-24
> limit Esi- 3.6661818	S4B-45	2.77e-24
> limit Esi- 9.831909	S4B-46	2.79e-24
C35 H33 N17 Na O	S4B-47	2.82e-24
C41 H34 N11 Na	S4B-48	2.95e-24
C32 H53 N4 Na O7 S	S4B-49	3.34e-24
9,11,15-Trihydroxyprosta-5,13- dienoic acid; (5Z ,8R ,9S ,11R ,12 R ,13E ,15S )-form, 11-Ac	S4B-50	3.65e-24
10-Aromadendranol; (1ct,4a,5 13,6a,7a,10a)-form, O -[2-	S4B-51	3.65e-24
> limit Esi- 3.6661818 :6	S4B-52	4.33e-24
C29 H51 N7 Na	S4B-53	4.81e-24
> limit Esi- 2.2995453	S4B-54	5.03e-24
> limit Esi- 6.651273	S4B-55	5.17e-24
Antimycin A; Antimycin A1	S4B-56	5.61e-24
> limit Esi- 4.160182	S4B-57	5.95e-24
C49 H101 N	S4B-58	5.95e-24
Lobophorolide	S4B-59	7.04e-24
Gorgiabisazulene	S4B-60	7.0378e-24
C34 H36 N15	S4B-61	7.04e-24
> limit Esi- 8.112819	S4B-62	7.38e-24
> limit Esi- 4.160182 :8	S4B-63	7.38e-24
C28 H35 Na O	S4B-64	7.61e-24
C38 H70 O9	S4B-65	8.24e-24
> limit Esi- 2.2995453 :9	S4B-66	8.67e-24
Ergosta-7,24(28)-dien-3-ol; (3i,5 ct)-form, 3-O -Sulfate	S4B-67	9.17e-24
C28 H50 N5 O12	S4B-68	9.71e-24
> limit Esi- 3.6669998	S4B-69	9.75e-24
> limit Esi- 8.112819 :7	S4B-70	9.75e-24
> limit Esi- 5.0374546	S4B-71	1.21e-23
Mycothiazole; 4,19-Dihydro, 4 ?,19-dihydroxy Esi- 4.187273	S4B-72	1.24e-23
> limit Esi- 4.335727	S4B-73	1.3e-23
Bastaxanthol; 16'-Deoxy, 3'13- alcohol, 3-O -sulfate	S4B-74	1.32e-23
C39 H68 O9	S4B-75	1.33e-23
C34 H60 N17	S4B-76	1.36e-23
> limit Esi- 2.746091	S4B-77	1.38e-23
> limit Esi- 5.7468185	S4B-78	1.88e-23
> limit Esi- 4.3358183	S4B-79	2.09e-23
> limit Esi- 6.9660907	S4B-80	2.44e-23
> limit Esi- 6.9690905	S4B-81	2.77e-23
> limit Esi- 2.2226362	S4B-82	2.91e-23
> limit Esi- 7.49991	S4B-83	2.91e-23
Manzamine A; (?)-form, 8- Hydroxy, 12-deoxy, 31-oxo, 12,34-epoxy, 32,33-dihydro	S4B-84	3.4e-23
> limit Esi- 3.5525453	S4B-85	3.76e-23
C16 H37 N14 Na O4	S4B-86	3.78e-23
> limit Esi- 2.977909	S4B-87	4.47e-23
Holokinins; Holokinin 2	S4B-88	4.78e-23
> limit Esi- 3.5532725	S4B-89	1.02e-22
C38 H71 N O12	S4B-90	1.03854e-22
C32 H53 N4 Na	S4B-91	1.19e-22
C17 H27 N13 Na O2	S4B-92	1.2e-22
C15 H15 N17 Na O5	S4B-93	1.22e-22
Quercetin 3-glycosides; Monosaccharides, 3-O -(6-O - Butyl-13-D-glucuronopyranoside)	S4B-94	1.39e-22
C20 H35 N24 Na O2	S4B-95	1.66e-22
C24 H51 N22 Na	S4B-96	1.77e-22
> limit Esi- 3.561637	S4B-97	1.77e-22
C25 H46 N27 O	S4B-98	2.01e-22
C26 H56 N22 S	S4B-99	2.08e-22
C37 H64 N5 Na O6	S4B-100	2.08e-22
C21 H30 N20 O2	S4B-101	2.74e-22
Dictyonamide A	S4B-102	2.94e-22
> limit Esi- 3.8206367	S4B-103	3.3e-22
C29 H34 N14 S	S4B-104	3.44e-22
> limit Esi- 4.6723633	S4B-105	4.02e-22
> limit Esi- 6.325182	S4B-106	4.45e-22
C32 H42 N O5	S4B-107	4.5e-22
C20 H16 N15 O2	S4B-108	4.56e-22
2-Amino-6-octadecene-1,3,4- triol; (2S ,3S ,4R ,6E)-form, 4- O -Sulfate	S4B-109	4.56e-22
C23 H30 N6 O3	S4B-110	4.89e-22
> limit Esi- 5.6	S4B-111	4.9e-22
> limit Esi- 3.563273	S4B-112	5.77e-22
C36 H34 N8 O	S4B-113	6.37e-22
3',4',5,5',7-Pentahydroxy-3- methoxyflavone; 7-O -a-L- Rhamnopyranoside Esi- 4.160182	S4B-114	6.55e-22
17,18-Epoxy-1(19),6,10(17),13- xenicatetraene-5,8,11,12,18- pentol	S4B-115	6.77e-22
> limit Esi- 4.574636	S4B-116	9.94e-22
Bengamide Z; 6-O -(13- Methyltetradecanoyl)	S4B-117	9.96e-22
2,9:3,16-Diepoxy-11-hydroxy- 4-asbestinanone; (7i ,11i )- form, Ac	S4B-118	1.31e-21
Glycerol 1-alkyl ethers; Glycerol 1-octadecyl ether, 3-O -(6-Deoxy- ?-D-allopyranoside)	S4B-119	1.61e-21
> limit Esi- 3.070091	S4B-120	1.86645e-21
> limit Esi- 4.670818	S4B-121	2.13e-21
3',4',5,7-Tetrahydroxyflavone; 7- O -[3,4-Dihydroxycinnamoyl-(?* ?)-3-D-glucopyranoside] Esi- 2.4803636	S4B-122	2.18e-21
Cholestane-3,5,6,15,16,26- hexol; (3i3,5ct,63,15ct,16i3,25R )-form	S4B-123	2.85e-21
> limit Esi- 3.2554548	S4B-124	2.85e-21
C16 H21 N12 Na O6	S4B-125	3.1e-21
> limit Esi- 4.6723633 :13	S4B-126	3.22e-21
C18 H19 N14 Na O6	S4B-127	3.45e-21
> limit Esi- 3.2107275	S4B-128	5.13e-21
Azaspiracid 1; 22-Demethyl	S4B-129	6.39e-21
C40 H59 N4 Na O3	S4B-130	6.47e-21
> limit Esi- 5.1213636	S4B-131	6.92e-21
C27 H45 N6 O11	S4B-132	8.5e-21
> limit Esi- 4.673091	S4B-133	9.14e-21
C35 H13 N9 Na O9	S4B-134	9.5e-21
C15 H15 N16 Na O7	S4B-135	9.52e-21
> limit Esi- 4.866	S4B-136	1.03e-20
C20 H39 Na O S2	S4B-137	1.21e-20
> limit Esi- 3.1061819	S4B-138	1.27e-20
> limit Esi- 7.804091	S4B-139	1.3e-20
C33 H51 N11 Na	S4B-140	1.32e-20
> limit Esi- 6.4119997	S4B-141	1.39e-20
> limit Esi- 6.842636	S4B-142	2.05e-20
C14 H25 N18 Na O3	S4B-143	2.06e-20
> limit Esi- 7.304182	S4B-144	2.09e-20
> limit Esi- 5.0670915	S4B-145	2.16e-20
C32 H61 N4 Na O9 S	S4B-146	2.57e-20
C24 H42 O13 S	S4B-147	3.33e-20
> limit Esi- 3.2740004	S4B-148	3.46e-20
> limit Esi- 2.389273	S4B-149	3.49e-20
> limit Esi- 5.586545	S4B-150	4.14341e-20
C35 H58 N7 O8 S	S4B-151	5.02e-20
1,8-Dihydroxy-3- methylanthraquinone; 8-O -[ii-D- Xylopyranosyl-(1--*6)-3-Dglucopyranoside]	S4B-152	5.97e-20
C35 H58 N7 O7 S	S4B-153	5.97e-20
> limit Esi- 5.616545	S4B-154	7.19e-20
Tedanolide; 13-Deoxy	S4B-155	7.33e-20
> limit Esi- 4.6723633 :15	S4B-156	8.06e-20
C13 H21 N8 O4	S4B-157	8.93e-20
Unguisin A	S4B-158	8.94e-20
> limit Esi- 4.261273	S4B-159	8.94e-20
> limit Esi- 9.366728	S4B-160	9.43e-20
> limit Esi- 3.5654547	S4B-161	9.96e-20
C22 H35 N4 Na O9 S	S4B-162	1.23e-19
> limit Esi- 3.1061819 :20	S4B-163	1.31e-19
Lydicamycin; 8-Deoxy, 14,15- didehydro	S4B-164	1.57e-19
> limit Esi- 4.673091 :21	S4B-165	1.7e-19
> limit Esi- 6.6740003	S4B-166	1.79e-19
> limit Esi- 4.2146363	S4B-167	1.95e-19
C19 H22 N15 O2	S4B-168	1.99e-19
> limit Esi- 4.507546	S4B-169	2.12e-19
C29 H48 N2 O4	S4B-170	2.58e-19
> limit Esi- 3.3326666	S4B-171	3.69e-19
C32 H55 N4 Na O3	S4B-172	3.93e-19
> limit Esi- 4.021091	S4B-173	4.58e-19
Polyprenol; Betulaprenol 7, O -[ii-D-Xylopyranosyl-(1?*4)-3 -D-xylopyranoside]	S4B-174	5.5e-19
C39 H55 N2 Na O	S4B-175	6.98e-19
C19 H18 N13 O5	S4B-176	7.91e-19
> limit Esi- 4.6545453	S4B-177	8.9e-19
> limit Esi- 4.1760907	S4B-178	9.59e-19
> limit Esi- 5.8998184 :23	S4B-179	1.04e-18
> limit Esi- 5.8998184	S4B-180	1.08369e-18
> limit Esi- 4.536182	S4B-181	1.17e-18
> limit Esi- 4.7838182	S4B-182	1.18e-18
C32 H21 N15 Na O2	S4B-183	1.21e-18
> limit Esi- 3.7998178	S4B-184	1.37e-18
C31 H57 N4 Na O10 S	S4B-185	1.6e-18
C24 H50 N21 Na O	S4B-186	2.54e-18
> limit Esi- 5.5082726	S4B-187	2.64e-18
Sphinxolide A; 8-Demethoxy	S4B-188	3.3e-18
> limit Esi- 3.9828184	S4B-189	3.6e-18
> limit Esi- 6.5895	S4B-190	3.72e-18
> limit Esi- 3.8012724	S4B-191	4.59e-18
3',4',5,7-Tetrahydroxyflavone; 7- O -[3,4-Dihydroxycinnamoyl-(?* ?)-3-D-glucopyranoside]	S4B-192	5.32e-18
> limit Esi- 3.6746361	S4B-193	6.11e-18
Variabilin?; (6E ,10E ,15R ,16Z )- form, 18-(14-Methylhexadecanoyl)	S4B-194	6.65e-18
> limit Esi- 4.4193635	S4B-195	7.23e-18
> limit Esi- 3.0041666	S4B-196	7.37e-18
> limit Esi- 3.4742	S4B-197	8.53e-18
> limit Esi- 4.050545	S4B-198	9.13e-18
> limit Esi- 6.0031996	S4B-199	1.48e-17
D-Arabinofuranose 5,5'- (hydrogen phosphate)	S4B-200	1.61e-17
> limit Esi- 6.4158177	S4B-201	1.61e-17
> limit Esi- 3.674727	S4B-202	1.61e-17
> limit Esi- 6.454727	S4B-203	1.73e-17
> limit Esi- 5.5076365	S4B-204	1.76e-17
C16 H4 N5 O	S4B-205	1.8e-17
> limit Esi- 3.599	S4B-206	2.22e-17
> limit Esi- 4.3419094	S4B-207	3.11e-17
C32 H50 N3 O9	S4B-208	4.6737e-17
Chartarin; 10-O -[6-Deoxy-3-O -methyl-ct-D-galactopyranosyl- (1?*2)-6-deoxy-3-D- galactopyranoside]	S4B-209	1.17e-16
Cholestane-3,4,6,15,24-pentol; (31 ,4f3,5ct,63,15i3,24S )-form, 3-(2-O -Methyl-13-Dxylopyranoside)	S4B-210	1.86e-16
Denticulatin A	S4B-211	2.08e-16
C19 H3 N2 Na O26	S4B-212	3.74e-16
> limit Esi- 1.6443334	S4B-213	3.74e-16
Stigmast-5-en-3-ol; (313,24R )- form, O -Sulfate	S4B-214	6.15e-16
> limit Esi- 7.9545	S4B-215	1.02e-15
C30 H56 N7 O2 S	S4B-216	2.23e-15
C17 H3 N5 Na O23 S	S4B-217	2.67e-15
3-O-3-D-Glucopyranosyl-D- glucose; 13-Pyranose-form, Me glycoside	S4B-218	6.01e-15
Antibiotic S 39163F1; 1- Demethyl	S4B-219	1.59e-14
C30 H46 N3 O7	S4B-220	8.73e-14
> limit Esi- 7.5085	S4B-221	3.14e-13
Ergosta-5,22-dien-3-ol; (313,22E , 24?)-form, 3-O -Sulfate	S4B-222	3.25e-13
C35 H65 N O5 S	S4B-223	3.39e-13
> limit Esi- 6.546227	S4B-224	5.96e-13
C28 H56 N15 Na	S4B-225	6.59e-13
C28 H58 N15 Na	S4B-226	6.76e-13
C30 H59 N4 Na O2 S	S4B-227	1.43e-12
> limit Esi- 3.6046665	S4B-228	1.35e-11
> limit Esi- 5.734667	S4B-229	3.74e-09
Graphislactone D; O 4-De-Me	S4B-230	5.21e-09
> limit Esi- 7.763	S4B-231	6.4e-09
> limit Esi- 6.9704995	S4B-232	6.5e-09
> limit Esi- 6.9725	S4B-233	6.91e-09
> limit Esi- 6.973167	S4B-234	8.17e-09
> limit Esi- 3.6689167	S4B-235	9.33e-09
C19 H11 N12 Na O14 Esi- 3.7983334	S4B-236	9.45e-09
5,12-Dihydrocycloocta[1,2-b :5,6-b ']diindole-6,13- dicarboxylic acid; N ,N' -Di-Me, di-Me ester	S4B-237	1.32159e-08
Ergost-5-en-3-ol; (313,24S)-form, 3-O -Sulfate	S4B-238	1.43e-08
> limit Esi- 5.5164165	S4B-239	1.43e-08
C20 H19 N12 Na O2	S4B-240	1.47e-08
9-Deazaadenosine; 5'-O -c-D- Glucopyranoside	S4B-241	1.52e-08
> limit Esi- 7.4432507	S4B-242	1.64e-08
> limit Esi- 7.443917	S4B-243	1.67e-08
> limit Esi- 4.61375	S4B-244	1.67e-08
> limit Esi- 4.6130004	S4B-245	1.67e-08
> limit Esi- 7.44325	S4B-246	1.7e-08
Thiomycalolide A	S4B-247	1.79e-08
> limit Esi- 7.4425836	S4B-248	1.93e-08
Okadaic acid Esi- 3.8245	S4B-249	2.08e-08
C36 H63 N11 Na	S4B-250	2.15e-08
> limit Esi- 4.0643997	S4B-251	2.15e-08
> limit Esi- 3.3313	S4B-252	2.17e-08
> limit Esi- 7.075318 :1	S4B-253	2.19e-08
> limit Esi- 4.0653	S4B-254	2.3e-08
> limit Esi- 7.075318	S4B-255	2.38e-08
> limit Esi- 5.9535	S4B-256	2.51e-08
C40 H55 N8 O6	S4B-257	2.54e-08
Leucascandrolide A	S4B-258	2.59e-08
C26 H41 N26 O	S4B-259	2.67e-08
> limit Esi- 7.1623	S4B-260	2.86e-08
C25 H43 N23 Na	S4B-261	3.15e-08
C33 H65 N O6 S Esi- 5.9614167	S4B-262	3.26e-08
> limit Esi- 7.0414	S4B-263	3.36e-08
C21 H26 N9 Na O	S4B-264	3.41e-08
> limit Esi- 9.749333	S4B-265	3.52e-08
C34 H53 N11 Na O3 S	S4B-266	3.54e-08
6,13-Epoxy-3,8-eunicelladiene-2, 11,12,15-tetrol	S4B-267	3.62409e-08
> limit Esi- 4.5730004	S4B-268	3.62e-08
C28 H36 N19 O	S4B-269	3.81e-08
5,8-Epidioxy-23-methylergosta-6, 22-dien-3-ol; (313,22E ,24R )- form, 3-O -Sulfate	S4B-270	4.34e-08
> limit Esi- 6.9634004	S4B-271	4.6e-08
C33 H61 N17 O	S4B-272	4.84e-08
Crellastatin A; 2,2'-Dideoxy	S4B-273	6.02e-08
C14 H23 N15 Na O4	S4B-274	6.3e-08
Xylose; a-D-Pyranose-form, 1,2, 4-Tribenzoyl	S4B-275	6.52e-08
Antanapeptin A; 5,6-Dihydro	S4B-276	7e-08
> limit Esi- 4.6728997	S4B-277	7.95e-08
Aplysia californica Myomodulins; Myomodulin E	S4B-278	7.95e-08
> limit Esi- 3.4898002	S4B-279	8.3e-08
> limit Esi- 5.8799	S4B-280	1e-07
C17 H17 N14 Na O5	S4B-281	1.02e-07
C37 H53 N11 O2	S4B-282	1.04e-07
11-Chloro-8,12-dihydroxy-5, 10,14,17-eicosatetraenoicacid; (5Z ,8?,9E ,11?,14Z ,17Z )-form	S4B-283	1.14e-07
8(12)-Drimene-1,2,11-triol; (1ct,2 ct)-form, Tri-Ac	S4B-284	1.14e-07
Fumitremorgin B; Tetrahydro	S4B-285	1.19e-07
3',4',5,7-Tetrahydroxyflavone; 7- O -(2S -13-D-Glucopyranosyloxypropanoyl)	S4B-286	1.24e-07
2-Amino-1,3,4-octadecanetriol; (2S ,3S ,4R )-form, N - Hexadecanoyl, 4-sulfate Esi- 6.7729554	S4B-287	1.27e-07
> limit Esi- 6.8417726	S4B-288	1.32e-07
C35 H38 N15	S4B-289	1.32e-07
C21 H26 N8 O6	S4B-290	1.33e-07
> limit Esi- 6.0906	S4B-291	1.34e-07
> limit Esi- 7.7650437	S4B-292	1.42e-07
2-Amino-1,3,4-octadecanetriol; (2S ,3S ,4R )-form, N - Hexadecanoyl, 4-sulfate Esi- 6.6610003 :5	S4B-293	1.5e-07
> limit Esi- 3.8565	S4B-294	1.52e-07
C23 H39 N21 Na O3	S4B-295	1.55e-07
> limit Esi- 6.9743085	S4B-296	1.59e-07
C23 H37 N21 Na O3	S4B-297	1.59297e-07
2-Amino-1,3,4-octadecanetriol; (2S ,3S ,4R )-form, N - Hexadecanoyl, 4-sulfate Esi- 6.6610003	S4B-298	1.62e-07
Norhalichondrin A; 12,13- Dideoxy	S4B-299	1.62e-07
> limit Esi- 7.3018	S4B-300	1.66e-07
2,9:3,16-Diepoxy-11-hydroxy- 4-asbestinanone; (7i ,11i )- form, Ac Esi- 2.9183	S4B-301	1.79e-07
> limit Esi- 3.1825001	S4B-302	1.8e-07
Zetekitoxin AB	S4B-303	1.82e-07
C28 H41 N21 Na	S4B-304	1.82e-07
C33 H59 N4 Na O9 S	S4B-305	1.91e-07
> limit Esi- 6.7061996	S4B-306	1.92e-07
C23 H45 N19 Na	S4B-307	1.93e-07
Cholestane-3,6,8,15,24-pentol; (313,5ct,6a,1513,24S )-form, 24- O -3-D-Glucopyranoside, 6- sulfate	S4B-308	1.93e-07
> limit Esi- 5.4115005	S4B-309	1.95e-07
Mozamide B	S4B-310	2.07e-07
> limit Esi- 7.9941	S4B-311	2.09e-07
> limit Esi- 5.6095996	S4B-312	2.12e-07
Hymenamide F	S4B-313	2.12e-07
C22 H43 N24 Na O	S4B-314	2.2e-07
C28 H38 N O4	S4B-315	2.29e-07
C21 H24 N O2	S4B-316	2.7e-07
C23 H40 N26 O	S4B-317	2.72e-07
> limit Esi- 6.2559233	S4B-318	2.79653e-07
C22 H46 N20	S4B-319	2.8e-07
C30 H55 N4 Na O10 S	S4B-320	3.01e-07
> limit Esi- 6.7882004	S4B-321	3.32e-07
C32 H55 N11 Na O4 S	S4B-322	4.87e-07
Phosphatidylethanolamine; Glycerol 1,2-di-9Z ,12Z - octadecadienoate 3- phosphoethanolamine	S4B-323	5.94e-07
C29 H50 N7 O5 S	S4B-324	6.47e-07
C17 H27 N13 Na	S4B-325	7.94e-07
3-O -/3-D-Xylopyranosyl-D-xylose; /3-Pyranose-form, Benzyl glycoside, 2',3',4'-tri-Ac	S4B-326	8.39e-07
> limit Esi- 6.5445385	S4B-327	9.53e-07
C43 H69 N10	S4B-328	9.91e-07
> limit Esi- 6.0726924	S4B-329	1.09e-06
> limit Esi- 9.370461	S4B-330	1.12e-06
C26 H22 N5 O10	S4B-331	1.21e-06
C27 H49 N3 O2	S4B-332	1.25e-06
17-Hydroxyandrost-4-en-3-one; 1713-form, 17-Phosphate	S4B-333	1.41e-06
5-Hydroxydiscodermolic acid; Me ester	S4B-334	1.95e-06
5-Fluoro-2,4(1H ,3H )- pyrimidinedione; 1-Benzyl	S4B-335	2.38e-06
Stigmastane-3,5,6,8,15,29-hexol; (3i3,5ct,63,83,15ct,24R )-form, 29-O -3-D-Glucopyranoside	S4B-336	2.49e-06
C31 H58 N7 O2 S	S4B-337	2.55e-06
> limit Esi- 7.0784993	S4B-338	2.61e-06
C12 H10 N4 Na O2	S4B-339	2.82e-06
> limit Esi- 3.569889	S4B-340	3.19e-06
C35 H61 N11	S4B-341	3.41e-06
> limit Esi- 3.8073332	S4B-342	3.64e-06
C34 H58 N18 O	S4B-343	3.69e-06
> limit Esi- 3.7986667	S4B-344	4.06e-06
C22 H13 N11 Na O3	S4B-345	4.2e-06
Staurosporine; 4'- De(methylamino), 4'ct-nitro	S4B-346	4.49e-06
Aspergillicin A; Demethoxy, N - de-Me	S4B-347	4.49e-06
> limit Esi- 3.105222	S4B-348	4.51432e-06
> limit Esi- 10.319777	S4B-349	4.54e-06
Patellamide G	S4B-350	4.62e-06
C23 H48 N20 O	S4B-351	4.68e-06
C29 H37 N11 Na O	S4B-352	4.76e-06
Glycerol 1-alkanoates; Glycerol 1- (15-methylhexadecanoate)	S4B-353	4.78e-06
> limit Esi- 3.0595558	S4B-354	5.04e-06
C43 H72 N8 O2	S4B-355	5.55e-06
C40 H59 N2 Na O	S4B-356	5.58e-06
Sulfobacin A Esi- 6.4132266	S4B-357	6.04e-06
C23 H51 N21	S4B-358	6.04e-06
C22 H17 N13 Na O5	S4B-359	6.04e-06
C15 H13 O5	S4B-360	6.09e-06
C30 H57 N4 Na O2 S	S4B-361	6.21e-06
C22 H26 N4 O8	S4B-362	6.54e-06
> limit Esi- 1.6836427	S4B-363	6.61e-06
27-Norcholestane-3,4,5,6,8, 14,15,24-octol Esi- 3.5492222	S4B-364	6.85e-06
> limit Esi- 7.7669287	S4B-365	7.29e-06
Malyngamide Q	S4B-366	7.36e-06
> limit Esi- 3.5023077	S4B-367	7.4e-06
C23 H49 N14 Na O2	S4B-368	7.42e-06
C17 H15 N9 Na O18	S4B-369	7.53e-06
Aspernigrin B	S4B-370	7.75e-06
> limit Esi- 3.5752497	S4B-371	8.2e-06
4-Methylbenzoic acid; Methylamide	S4B-372	8.75e-06
C13 H21 N14 Na O12 Esi- 3.7975454	S4B-373	9.12e-06
1,3,5-Bisabolatriene-1,7,12,15- tetrol; 12-Carboxylic acid, amide	S4B-374	9.62e-06
C20 H21 N12 Na O3	S4B-375	9.64e-06
3(20)-Phytene-1,2-diol; (2?,7 ?,11?)(1)-form, Di-Ac	S4B-376	9.76e-06
Nonactic acid trimer; Homologue (R1 = R2 = CH2CH3)	S4B-377	9.91e-06
C16 H13 N14 Na O5	S4B-378	1.0198e-05
C32 H62 O6 S	S4B-379	1.03e-05
C21 H46 N20	S4B-380	1.05e-05
2-(Aminomethyl)-2-propenoic acid; N -(2-Hydroxyhexadecanoyl), Me ester	S4B-381	1.06e-05
C33 H62 N5 Na O3	S4B-382	1.06e-05
3-Hydroxy-1H -indole-2-thiol	S4B-383	1.14e-05
C22 H24 N6 O5	S4B-384	1.15e-05
> limit	S4B-385	1.15e-05
C36 H55 N17 Na	S4B-386	1.16e-05
> limit Esi- 1.6695001	S4B-387	1.2e-05
C20 H20 N8 O6	S4B-388	1.2e-05
10-Aromadendranol; (1ct,4a,5 13,6a,7ct,10ct)-form, O -[2-	S4B-389	1.29e-05
C38 H70 N5 Na O7	S4B-390	1.33e-05
C24 H18 N12	S4B-391	1.35e-05
Mesobiliverdin IXct; Di-Me ester	S4B-392	1.35e-05
Toxadocial A	S4B-393	1.35e-05
> limit Esi- 6.742786	S4B-394	1.37e-05
C19 H17 N15 Na O7	S4B-395	1.38e-05
C45 H68 N10	S4B-396	1.41e-05
> limit Esi- 3.5752857	S4B-397	1.43e-05
C19 H20 N18 O	S4B-398	1.45e-05
C27 H15 N3 Na O16	S4B-399	1.52e-05
C22 H45 N26 Na O2	S4B-400	1.53e-05
> limit Esi- 3.1941252	S4B-401	1.53e-05
Cholestane-3,6,7,15,24-pentol	S4B-402	1.54e-05
C27 H37 N11 Na O3	S4B-403	1.55e-05
C44 H38 N Na	S4B-404	1.55e-05
C14 H13 N13 Na O17	S4B-405	1.56e-05
2-Hydroxy-14- methylpentadecanoic acid	S4B-406	1.57e-05
> limit Esi- 3.667125	S4B-407	1.61e-05
Antimycin A; Antimycin A5	S4B-408	1.64421e-05
C30 H55 N8 S	S4B-409	1.71e-05
> limit Esi- 3.57775	S4B-410	1.71e-05
C17 H31 N14 Na O	S4B-411	1.73e-05
Ribitol; 2,3,4-Tribenzyl, 1,5- ditrityl	S4B-412	1.74e-05
> limit Esi- 5.605214	S4B-413	1.74e-05
> limit Esi- 3.5626252	S4B-414	1.76e-05
Schulzeine A	S4B-415	1.78e-05
> limit Esi- 3.6438568	S4B-416	1.87e-05
C20 H23 N12 Na O4	S4B-417	1.89e-05
C24 H10 N11 O13	S4B-418	1.94e-05
C35 H63 N11 O2	S4B-419	1.95e-05
> limit Esi- 6.412228	S4B-420	2.03e-05
C32 H67 N14 O2	S4B-421	2.04e-05
C22 H40 N27	S4B-422	2.05e-05
C16 H14 N9 O8	S4B-423	2.06e-05
> limit Esi- 4.1868753	S4B-424	2.15e-05
C36 H54 N O3	S4B-425	2.18e-05
C16 H13 N13 Na O9	S4B-426	2.23e-05
1(19),7,10,12-Xenicatetraene-6, 14,17,18-tetrol; (6a,7Z ,10E ,12E )-form, 17-Eicosanoyl, 18-Ac	S4B-427	2.23e-05
Pinnaic acid; Taurine amide	S4B-428	2.29e-05
Chondrillin; (3S ,6S )-form	S4B-429	2.33e-05
> limit Esi- 3.567375	S4B-430	2.33e-05
C9 H11 N2 Na O8	S4B-431	2.38e-05
> limit Esi- 6.3259997	S4B-432	2.39e-05
C34 H62 N5 Na	S4B-433	2.39e-05
> limit Esi- 8.488501	S4B-434	2.63e-05
2-Amino-8-octadecene-1,3,4- triol; (2S ,3S ,4R ,8Z)-form, N -Hexadecanoyl, 1-O -3-D- glucopyranoside	S4B-435	2.63e-05
C24 H20 N10 O13	S4B-436	2.67e-05
Protoporphyrin; Sn complex	S4B-437	2.68e-05
C10 H9 N7 Na O2	S4B-438	2.68058e-05
Phosphatidylcholine; Glycerol 1,2-di-9,12,15- octadecatrienoate 3- phosphocholine	S4B-439	2.81e-05
> limit Esi- 4.1385	S4B-440	2.9e-05
C15 H29 N21 Na O	S4B-441	3.02e-05
C15 H21 N13 Na O10	S4B-442	3.02e-05
C18 H5 N3 Na O2	S4B-443	3.02e-05
C22 H31 N21 Na O	S4B-444	3.05e-05
C19 H N Na O29	S4B-445	3.33e-05
2-Amino-4,8-octadecadiene-1, 3-diol; (2S ,3R ,4E ,8E )-form, N -Me, N-octadecanoyl, 1-O-sulfate	S4B-446	3.34e-05
2-Amino-3-hydroxy-4- octadecene-1-sulfonic acid; (2 S ,3R )-form, N -Tetradecanoyl	S4B-447	3.34e-05
2-Amino-3-hydroxy-4- octadecene-1-sulfonic acid; (2 S ,3R )-form, N -Tetradecanoyl Esi- 6.1705	S4B-448	3.34e-05
> limit Esi- 5.5939994	S4B-449	3.41e-05
> limit Esi- 6.593375	S4B-450	3.59e-05
C17 H21 N14 Na O5	S4B-451	3.62e-05
> limit Esi- 7.8770723	S4B-452	3.92e-05
> limit Esi- 4.14175	S4B-453	4.11e-05
<none> Esi- 3.482	S4B-454	4.36e-05
> limit Esi- 10.072072	S4B-455	4.48e-05
C20 H5 N Na O28	S4B-456	4.55e-05
C26 H N2 Na O23	S4B-457	4.62e-05
C27 H19 N3 Na O10	S4B-458	4.65e-05
C37 H67 N6 Na O3	S4B-459	4.89e-05
> limit Esi- 4.27425	S4B-460	4.94e-05
C36 H67 N11 O2 S	S4B-461	5.03e-05
C17 H2 O7 S	S4B-462	5.14e-05
C37 H68 N2 O7	S4B-463	6.15e-05
> limit Esi- 8.15325	S4B-464	6.49e-05
C14 H19 N12 Na O11	S4B-465	6.58e-05
> limit Esi- 3.4829996	S4B-466	6.8e-05
> limit Esi- 5.7954288	S4B-467	6.9e-05
> limit Esi- 3.4809997	S4B-468	6.89688e-05
C17 H5 Na O27	S4B-469	7e-05
> limit Esi- 3.4809997 :22	S4B-470	7.16e-05
> limit Esi- 3.4799998	S4B-471	7.26e-05
Aurantiamide; O -Ac	S4B-472	7.64e-05
C35 H57 N11 Na O	S4B-473	7.64e-05
> limit Esi- 5.2288575	S4B-474	7.67e-05
Fuscoatroside	S4B-475	7.82e-05
C24 H15 N15 O3	S4B-476	7.9e-05
> limit Esi- 9.629999	S4B-477	7.94e-05
<none> Esi- 3.6725001	S4B-478	8e-05
> limit Esi- 5.0400705	S4B-479	8.08e-05
> limit Esi- 5.7518573	S4B-480	8.16e-05
> limit Esi- 6.703875	S4B-481	8.42e-05
C37 H60 N12 Na O	S4B-482	8.42e-05
Sulfobacin A	S4B-483	8.72e-05
C20 H28 N2 O14	S4B-484	8.98e-05
Sagittamide A; 7-O -De-Ac	S4B-485	9.18e-05
Pectenotoxin 1; 43-Aldehyde	S4B-486	9.45e-05
2-Amino-3-hydroxy-4- octadecene-1-sulfonic acid; (2 S ,3R )-form, N -Tetradecanoyl Esi- 5.3354287	S4B-487	9.5e-05
Phakellistatin 7; 1-L- Threonine analogue	S4B-488	9.51e-05
Hymenamide J	S4B-489	9.52e-05
> limit Esi- 8.004286	S4B-490	9.52e-05
C31 H59 N8 S	S4B-491	9.61e-05
> limit Esi- 8.00493	S4B-492	9.88e-05
> limit Esi- 5.7482142 :4	S4B-493	9.9e-05
C40 H68 N5 Na O6	S4B-494	0.000101
C28 H45 N4 Na O S	S4B-495	0.000101
C22 H N Na O27	S4B-496	0.000101
C13 H17 N15 Na O4	S4B-497	0.000104
C36 H70 N5 Na O2 S	S4B-498	0.000107187
C21 H N Na O28	S4B-499	0.000107
Bradykinin	S4B-500	0.00011
Okadaic acid; 27-Ac	S4B-501	0.000111
C15 H N4 Na O30	S4B-502	0.000114
C31 H62 O7 S	S4B-503	0.000117
> limit Esi- 6.112786	S4B-504	0.000118
C34 H54 N12 Na	S4B-505	0.00012
> limit Esi- 3.4875712	S4B-506	0.000125
> limit Esi- 5.7482142	S4B-507	0.000133
> limit Esi- 6.027072	S4B-508	0.000135
> limit Esi- 3.5349288	S4B-509	0.000137
> limit Esi- 7.021817	S4B-510	0.000144
C14 H27 N12 Na O4	S4B-511	0.000144
Acanthagangliosides A-H; Acanthaganglioside B	S4B-512	0.000147
<none>	S4B-513	0.000157
> limit Esi- 3.587857	S4B-514	0.00016
> limit Esi- 4.613933	S4B-515	0.000163
> limit Esi- 3.3897145	S4B-516	0.000173
2-Amino-1,3,4-octadecanetriol; (2S ,3S ,4R )-form, N - Hexadecanoyl, 4-sulfate Esi- 6.2082496	S4B-517	0.000179
> limit Esi- 6.6266427	S4B-518	0.000179
C19 H26 N7 O13 S	S4B-519	0.000181
C28 H29 N14 Na O	S4B-520	0.000184
1-Nor-2,19-phytanediol; (3S , 7?,11?)-form, Di-O -sulfate	S4B-521	0.00019
C19 H21 N15 Na O3	S4B-522	0.000194
> limit Esi- 6.1346426	S4B-523	0.000198
> limit Esi- 6.7059336	S4B-524	0.000201
C40 H63 N2 O5	S4B-525	0.00021
C15 H12 N O2 S	S4B-526	0.000235679
C13 H21 N14 Na O12	S4B-527	0.000237
C34 H42 N8	S4B-528	0.000241
C38 H68 N5 Na	S4B-529	0.000267
C14 H3 N2 Na O23	S4B-530	0.000275
> limit Esi- 5.976143	S4B-531	0.000275
> limit Esi- 6.579857	S4B-532	0.000302
Stigmasta-5,24(28)-dien-3-ol; (3 ?,24(28)E )-form, 3-O -Sulfate	S4B-533	0.000316
>limit Esi- 5.6436815 :0	S4B-534	0.000317
> limit Esi- 5.6436815	S4B-535	0.000317
Laurencianol	S4B-536	0.000348
C21 H44 N20	S4B-537	0.000376
C11 H28 N12 Na	S4B-538	0.000391
> limit Esi- 7.2449293	S4B-539	0.00041
Prunolide A; Octakis(debromo)	S4B-540	0.00041
> limit Esi- 6.0875835	S4B-541	0.000433
Mycothiazole; 4,19-Dihydro, 4 ?,19-dihydroxy	S4B-542	0.000438
C14 H17 N12 Na O11	S4B-543	0.000441
Peroxyplakoric acid A1	S4B-544	0.000443
C31 H46 N5 Na O5	S4B-545	0.000443
> limit Esi- 7.482643	S4B-546	0.000453
> limit Esi- 7.0202227	S4B-547	0.000472
> limit Esi- 8.630334	S4B-548	0.000473
PAFYSQRY amide	S4B-549	0.000474
C32 H60 N5 Na O S	S4B-550	0.000497
> limit Esi- 6.1062856	S4B-551	0.000509
C19 H18 N15 O	S4B-552	0.000517
Thymidine; 3'-Mesyl	S4B-553	0.00052
1-Nor-2,19-phytanediol; (3S , 7?,11?)-form, Di-O -sulfate Esi- 4.5271335	S4B-554	0.000523
> limit Esi- 3.4883997	S4B-555	0.0005302
> limit Esi- 5.848182 :2	S4B-556	0.000567
C22 H50 N15 Na	S4B-557	0.00057
> limit Esi- 6.6132	S4B-558	0.00057
> limit Esi- 6.614	S4B-559	0.000571
C39 H57 N2 O2	S4B-560	0.00058
Petrosynol; Tetraketone	S4B-561	0.000581
> limit Esi- 5.846375	S4B-562	0.000611
C35 H68 N5 Na O S	S4B-563	0.000614
> limit Esi- 6.326334	S4B-564	0.000627
C29 H53 N23	S4B-565	0.000631
> limit Esi- 8.023909	S4B-566	0.000632
> limit Esi- 5.848182	S4B-567	0.000634
27-Norcholestane-3,4,5,6,8, 14,15,24-octol	S4B-568	0.000635
> limit Esi- 6.1557727	S4B-569	0.000662
C20 H14 N16 O10	S4B-570	0.000675
C27 H55 N13 O	S4B-571	0.000702
C17 H3 N Na O29 S	S4B-572	0.000717
> limit Esi- 7.4459376	S4B-573	0.000724
C35 H64 N2 Na O3 S	S4B-574	0.000725
> limit Esi- 7.170769	S4B-575	0.000732
C26 H22 N12 O	S4B-576	0.000739
C23 H4 N O2	S4B-577	0.000749
> limit Esi- 6.1527724	S4B-578	0.000761
C23 H16 N10 O12	S4B-579	0.00078
> limit Esi- 8.630833	S4B-580	0.000786
C5 H8 N4 Na O7 S4	S4B-581	0.000798
> limit Esi- 9.743667	S4B-582	0.000802
2-Amino-1,3,4-octadecanetriol; (2S ,3S ,4R )-form, N - Hexadecanoyl, 4-sulfate	S4B-583	0.000806
Nephrops Gastric peptide	S4B-584	0.000825
C27 H56 N15 Na	S4B-585	0.000831859
C6 H2 Cl3 N3 Na O9 S5	S4B-586	0.000837
> limit Esi- 5.199286	S4B-587	0.000849
4,5-Dibromo-9,10-dihydro-2,3, 6,7-phenanthrenetetrol	S4B-588	0.000852
Ribitol; 2,4-O -Benzylidene, 1,5-dibenzoyl, 3-mesyl	S4B-589	0.000871
C21 H14 N13 O11	S4B-590	0.000884
> limit Esi- 4.142667	S4B-591	0.000887
C19 H11 N10 Na O17	S4B-592	0.000928
Microsclerodermin A	S4B-593	0.000942
> limit Esi- 3.4789999	S4B-594	0.000975
C21 H18 N13 O7	S4B-595	0.00098
> limit Esi- 5.6444087	S4B-596	0.00098

## Sheet: S4c
Table S4c: Compounds common to both species of Dinophysis differentially expressed ( fold-change > 2, p < 0.001) with interactions between "prey origin" and "species" (ESI-)
Compound	ID	p (Corr) (Prey-origin-Species)
C39 H55 N2 Na O	S4C-1	7.04e-18
C19 H18 N13 O5	S4C-2	7.04e-18
C24 H50 N21 Na O	S4C-3	1.75e-17
> limit Esi- 6.5895	S4C-4	1.75e-17
> limit Esi- 3.4742	S4C-5	6.08e-17
C16 H4 N5 O	S4C-6	7.26e-17
> limit Esi- 3.599	S4C-7	7.26e-17
> limit Esi- 3.3326666	S4C-8	1.12e-16
C32 H21 N15 Na O2	S4C-9	3.26e-16
Variabilin?; (6E ,10E ,15R ,16Z )- form, 18-(14-Methylhexadecanoyl)	S4C-10	1.34e-15
> limit Esi- 3.0041666	S4C-11	1.34e-15
C19 H3 N2 Na O26	S4C-12	1.34e-15
> limit Esi- 6.0031996	S4C-13	1.6e-15
Stigmast-5-en-3-ol; (313,24R )- form, O -Sulfate	S4C-14	1.63e-15
> limit Esi- 7.9545	S4C-15	1.63e-15
C30 H56 N7 O2 S	S4C-16	5.38e-15
C32 H50 N3 O9	S4C-17	5.9e-15
C17 H3 N5 Na O23 S	S4C-18	5.9e-15
Chartarin; 10-O -[6-Deoxy-3-O -methyl-ct-D-galactopyranosyl- (1?*2)-6-deoxy-3-D- galactopyranoside]	S4C-19	1.71e-14
Antibiotic S 39163F1; 1- Demethyl	S4C-20	2.66e-14
Denticulatin A	S4C-21	2.69e-14
> limit Esi- 1.6443334	S4C-22	4.82e-14
C28 H56 N15 Na	S4C-23	8.64e-14
Ergosta-5,22-dien-3-ol; (313,22E , 24?)-form, 3-O -Sulfate	S4C-24	9.94e-14
C28 H58 N15 Na	S4C-25	1.55e-13
C35 H65 N O5 S	S4C-26	1.85e-13
C30 H46 N3 O7	S4C-27	7.29e-12
C30 H59 N4 Na O2 S	S4C-28	8.31e-12
> limit Esi- 3.6046665	S4C-29	1.47e-11
> limit Esi- 7.5085	S4C-30	4.57517e-11
C33 H65 N O6 S Esi- 5.9614167	S4C-31	3.31e-10
2-Amino-1,3,4-octadecanetriol; (2S ,3S ,4R )-form, N - Hexadecanoyl, 4-sulfate Esi- 6.2082496	S4C-32	8.14e-07
Sulfobacin A Esi- 6.4132266	S4C-33	1.13e-06
C21 H14 N14 O9	S4C-34	1.13e-06
C31 H59 N8 S	S4C-35	2.27e-06
C13 H21 N14 Na O12	S4C-36	6.37e-06
C13 H15 N17 Na O11	S4C-37	1.08e-05
C51 H102 O	S4C-38	1.21e-05
C19 H26 N7 O13 S	S4C-39	1.28e-05
Mycothiazole; 4,19-Dihydro, 4 ?,19-dihydroxy Esi- 4.187273	S4C-40	1.33e-05
C35 H33 N17 Na O	S4C-41	1.81e-05
27-Norcholestane-3,4,5,6,8, 14,15,24-octol	S4C-42	2.2e-05
C34 H60 N17	S4C-43	2.45e-05
2-Amino-1,3,4-octadecanetriol; (2S ,3S ,4R )-form, N - Hexadecanoyl, 4-sulfate Esi- 6.6610003 :5	S4C-44	3.44e-05
C33 H54 N12 O	S4C-45	3.44e-05
C30 H46 N4 O	S4C-46	3.44e-05
2-Amino-1,3,4-octadecanetriol; (2S ,3S ,4R )-form, N - Hexadecanoyl, 4-sulfate Esi- 6.6610003	S4C-47	3.6e-05
C42 H76 N5 Na	S4C-48	4.48e-05
C38 H61 N10 O2	S4C-49	5.1e-05
Ergosta-7,24(28)-dien-3-ol; (3i,5 ct)-form, 3-O -Sulfate	S4C-50	5.1e-05
C20 H35 N24 Na O2	S4C-51	6.09e-05
C40 H63 N2 O2	S4C-52	7.14e-05
C35 H52 N17	S4C-53	0.000106
Dopamine; N -[3- (Carboxyacetylamino)propanoyl], 3-O -3-D-glucopyranoside	S4C-54	0.000108
2-Amino-1,3,4-octadecanetriol; (2S ,3S ,4R )-form, N - Hexadecanoyl, 4-sulfate Esi- 6.7729554	S4C-55	0.000114
Geniposidic acid; 10-O -(3,4- Dihydroxy-E -cinnamoyl) Esi- 4.923	S4C-56	0.000159
Geniposidic acid; 10-O -(3,4- Dihydroxy-E -cinnamoyl)	S4C-57	0.000159
Manzamine A; (?)-form, 8- Hydroxy, 12-deoxy, 31-oxo, 12,34-epoxy, 32,33-dihydro	S4C-58	0.000211
C31 H62 O7 S	S4C-59	0.000279
<none>	S4C-60	0.000278886
C28 H29 N14 Na O	S4C-61	0.000279
C19 H21 N15 Na O3	S4C-62	0.000282
C35 H69 N O6 S	S4C-63	0.000285
C30 H55 N8 S	S4C-64	0.000295
Sulfobacin A	S4C-65	0.000295
Fuscoatroside	S4C-66	0.000318
C15 H12 N O2 S	S4C-67	0.000353
Staurosporine; 4'- De(methylamino), 4'ct-nitro	S4C-68	0.000404
Patellamide G	S4C-69	0.00043
> limit Esi- 4.335727	S4C-70	0.000435
> limit Esi- 4.3358183	S4C-71	0.000435
> limit Esi- 5.748455	S4C-72	0.0005
> limit Esi- 3.4883997	S4C-73	0.000502
C11 H28 N12 Na	S4C-74	0.000553
> limit Esi- 8.456182	S4C-75	0.000621
C23 H30 N6 O3	S4C-76	0.000641
3',4',5,7-Tetrahydroxyflavone; 7- O -[3,4-Dihydroxycinnamoyl-(?* ?)-3-D-glucopyranoside] Esi- 2.4803636	S4C-77	0.000641
Malyngamide Q	S4C-78	0.000641
2-Amino-3-hydroxy-4- octadecene-1-sulfonic acid; (2 S ,3R )-form, N -Tetradecanoyl Esi- 6.1705	S4C-79	0.000641
C16 H11 N3 S	S4C-80	0.000641
2-Amino-3-hydroxy-4- octadecene-1-sulfonic acid; (2 S ,3R )-form, N -Tetradecanoyl	S4C-81	0.000642
> limit Esi- 6.1062856	S4C-82	0.000659
C35 H13 N9 Na O9	S4C-83	0.000702
Glycerol 1-alkyl ethers; Glycerol 1-octadecyl ether, 3-O -(6-Deoxy- ?-D-allopyranoside)	S4C-84	0.000703
C22 H50 N15 Na	S4C-85	0.00073
> limit Esi- 3.2130003	S4C-86	0.000799
> limit Esi- 9.831909	S4C-87	0.000805
C21 H46 N20	S4C-88	0.000848
C29 H53 N23	S4C-89	0.000885
C37 H68 N2 O7	S4C-90	0.000899096
C36 H65 N8 S	S4C-91	0.000905

## Sheet: S5a
S5A: Statistically significant compounds common to both species of Dinophysis presented as a function of "species", "prey origin" and "nutritional status" in ESI-
Compound	ID	RT	Mass	Score	ESI	Abundance		Species	Origin	Feeding
Mar Nat Prod						AV	SD
Okadaic acid	S5A-1	3.49	804.466	93.41	-	14.25	0.08	D. acuta	Spain	well-fed
						13.78	0.22	D. acuta	Denmark	well-fed
						15.43	0.17	D. acuta	Spain	Prey-limited
						14.04	0.04	D. acuta	Denmark	Prey-limited
						13.62	0.72	D. acuminata	Spain	well-fed
						15.39	0.08	D. acuminata	Denmark	well-fed
						15.19	0.05	D. acuminata	Spain	Prey-limited
						15.29	0.51	D. acuminata	Denmark	Prey-limited
Roridin H; 7β, 8β-Epoxide (Mass: 526,2207)	S5A-2	3.6	588.136	96.4	-	15.78	0.09	D. acuta	Spain	well-fed
						15.95	0.03	D. acuta	Denmark	well-fed
						16.43	0.13	D. acuta	Spain	Prey-limited
						16.75	0.07	D. acuta	Denmark	Prey-limited		Roridin H; 7β, 8β-Epoxide (C29H34O9): metabolite of Cylindrocarpon spp. (ascomycte fungus)
						16.33	0.46	D. acuminata	Spain	well-fed
						13.71	0.1	D. acuminata	Denmark	well-fed
						16.84	0.04	D. acuminata	Spain	Prey-limited
						14.29	0.16	D. acuminata	Denmark	Prey-limited
5,8-Epidioxyergosta-6,22-dien-3- ol; (3β,5α,8α,22E ,24R )-form, Octadecanoyl (Mass: 694,5822)	S5A-3	6.87	808.582	89.46	-	13.35	0.12	D. acuta	Spain	well-fed
						13.33	0.05	D. acuta	Denmark	well-fed
						13.21	0.13	D. acuta	Spain	Prey-limited
						12.73	0.08	D. acuta	Denmark	Prey-limited
						15.14	0.1	D. acuminata	Spain	well-fed
						15.23	0.1	D. acuminata	Denmark	well-fed
						14.44	0.09	D. acuminata	Spain	Prey-limited
						12.45	0.84	D. acuminata	Denmark	Prey-limited
C39 H73 N O6 S+A1:L35A20A2:L35A1:K35A2:K35A4:K35	S5A-4	9.07	683.516	94.01	-	13.5	0.12	D. acuta	Spain	well-fed
						14.54	0.16	D. acuta	Denmark	well-fed
						12.44	0.02	D. acuta	Spain	Prey-limited
						14.11	0.09	D. acuta	Denmark	Prey-limited
						12.62	0.82	D. acuminata	Spain	well-fed
						11.72	0.18	D. acuminata	Denmark	well-fed
						14.5	0.14	D. acuminata	Spain	Prey-limited
						12.53	0.35	D. acuminata	Denmark	Prey-limited

[truncated: 12 more sheets: S5b, S6a, S6b, S7a, S7b, S8, S9a, S9b, S10, S11a, S11b, S12]
